# Supplementary material for: Quantitative insertion-site sequencing (QIseq) for high throughput phenotyping of transposon mutants
Source: HighWire-hosted journal article supplement (doi:10.1101/gr.200279.115), 2016-05-10
Supplement: Supplemental_Methods_S1.docx [file Supplemental_Methods_S1.docx]

**SUPPLEMENTAL METHODS**

***Plasmodium falciparum culture and piggyBac* mutants*.*** *P. falciparum* mutant clones were cultured by standard methods ([Moll et al. 2008](#_ENREF_8)) in human erythrocytes at 5% hematocrit and RPMI 1640 medium containing 0.5% Albumax II, 0.25% sodium bicarbonate and 0.01 mg/ml gentamicin. *P. falciparum* mutant clones with *piggyBac* insertions were generated with a range of transposon and transposase plasmids on the NF54 clone background ([Balu et al. 2009](#_ENREF_1)). Creation of the mutant clones were published previously ([Balu et al. 2009](#_ENREF_1); [Balu et al. 2010](#_ENREF_2)), while new *piggyBac* insertions identified for the first time through in this work used similar methods with pBacII-HDH and the helper plasmid pDCTH with the addition of a BSD selectable marker ([Balu et al. 2009](#_ENREF_1); [Balu et al. 2010](#_ENREF_2)). Selection of mutant clones was obtained by limiting dilution of parasites during post-drug selection (2.5nM WR99210).

**DNA preparation.** *P. falciparum* genomic DNA for sequencing was isolated from 10-ml blood-stage parasites culture at 3~ 5% late stage parasitemia by using a QIAamp DNA Blood Mini Kit (QIAGEN). 0.5 ug - 1.0 ug genomic DNA of each mutant line and mixed mutant pool were used for preparing QIseq libraries.

**QIseq Illumina library preparation.** *Plasmodium falciparum* DNA was quantified using Qubit High Sensitivity assay according to the manufacturers protocol (Life Technologies Ltd, UK). Between 200 and 500 ng was sheared using a Covaris E210 Adaptive Focused Acoustics ultrasonicator (LGC Genomics, UK) to an average size of 500 bp. The DNA was end repaired, a-tailed and adapter ligated using a NEBNext DNA Library Prep kit (New England Biolabs (UK) Ltd, UK). Instead of the standard Illumina adapter a specific adapter containing a 5’ hairpin (Splinkerette adapter) was ligated to the DNA. Splinkerette adapter: top: 5’‑GTTCCCATGGTACTACTCATATAATACGACTCACTATAGGTGACAGCGAGCGCT‑3’ bottom: 5’‑P‑GCGCTCGCTGTCACCTATAGTGAGTCGTATTATAATTTTTTTTTCAAAAAAA-3’. A 5’ Phosphate group (P) was added to help specific ligation of this adapter to the DNA library. This Splinkerette adapter was adapted and elongated from ([Uren et al. 2009](#_ENREF_11)) to accommodate Illumina sequencing and multiplexing.

*piggyBac* insertion sites were acquired from the adapter ligated DNA library using two nested PCR reactions (PCR1 and PCR2). For this the adapter-ligated library DNA was split in two to amplify both the 5’ and 3’ end of the *piggyBac* transposon respectively into two separate libraries. All PCR reactions were done with KAPA KAPAHiFi HotStart (Anachem Ltd., UK). PCR1 conditions were as follows (SplAP1: 5’‑GTTCCCATGGTACTACTCATA‑3’ with PB5‑1: 5’‑GATATACAGACCGATAAAACACATGCGTCA‑3’ or PB3‑1: 5’‑GACGGATTCGCGCTATTTAGAAAGAGAG‑3’ for 3’ or 5’ Piggybac ends respectively; 12 cycles of PCR; annealing at 63°C; extension at 68°C [to improve amplification of the AT rich DNA]). These PCR1 reactions were cleaned using 0.8x volume Ampure XP (Beckman Coulter (UK) Ltd, UK) to remove residual PCR primers. Next a nested PCR (PCR2) was done for both 5’ and 3’ ends to produce libraries containing only *piggyBac* integration sequences. PCR2 conditions were as follows (P7‑SplAP2 5’‑CAAGCAGAAGACGGCATACGAGATCGGTXXXXTAATACGACTCACTATAGG‑3’; XXX is for the reverse complement of the index] with PB5‑2: 5’‑A*ATGATACGGCGACCACCGAGATCTACACCACGCATGATTATCTTTAACGTACGTCA*C‑3’, PB3‑2: 5’‑AATGATACGGCGACCACCGAGATCTACACATGCGTCAATTTTACGCAGACTATC‑3’ for 3’ or 5’ *piggyBac* ends respectively; 12 cycles of PCR; annealing at 60°C; extension at 68°C). Again the PCR reactions were cleaned using 0.8x volume Ampure XP (Beckman Coulter (UK) Ltd, UK) to remove residual PCR primers.

**QIseq library quality control and sequencing approach.** To determine library yield, 3 individual qPCRs were done on the finished library using the following forward: PB5pr_seq: 5’‑TGATTATCTTTAACGTACGTCACAATATGATTATCTTTC‑3’ [*piggyBac* 3’ specific]; PB3pr_seq: 5’‑ATGCGTCAATTTTACGCAGACTATCTTTC‑3’ [*piggyBac* 5’ specific]; PE2.1: 5’‑AATGATACGGCGACCACCGAGATC-3’ [Illumina P5 sequence specific]; and reverse (PE2.2: 5’‑CAAGCAGAAGACGGCATACGAGAT‑3’ [Illumina P7 sequence specific]) primers. qPCR conditions were standard for the KAPA HiFi qPCR kit (Anachem Ltd., UK) and all products were quantified relative to the defined standards from the kit. For optimal loading conditions concentrations of the orientation specific *piggyBac* primers were used. Generally these were very similar to the Illumina P5-P7 specific product, whereas the PCR signal for the opposite *piggyBac* end always gave a much lower fluorescent signal.

To confirm transposon integrations only, the sequencing primers were designed within the long terminal repeat region of the *piggyBac* transposon integration site 5 bases upstream of *piggyBac* integration site sequence (TTAA). PB5pr_seq_2 5’‑CACCGAGATCTACACCACGCATGATTATCTTTAACGTACGTCACAATATGATTATCTTTC‑3’ for the 3’ *piggyBac*sequence; PB3pr_seq_3 5’‑CACCGAGATCTACACATGCGTCAATTTTACGCAGACTATCTTTC‑3’ for the 5’ *piggyBac* sequence;  Spl_rev_seq 5’‑TAATACGACTCACTATAGGTGACAGCGAGCGCT‑3’ for the reverse sequence; and Spl_tag_seq 5’‑AGCGCTCGCTGTCACCTATAGTGAGTCGTATTA‑3’ to determine the index sequence for multiplexing. Since this meant all reads started with the same 9 bases it interfered with Illumina’s template generation step. To skip template generation in the 9 bp mono-template sequence, the standard Amplicon recipe was modified. This modified recipe commenced the sequencing reaction with dark-cycles (cycles where incorporation of bases but no imaging takes place). To confirm the sequence of these omitted bases a separate transposon index read (index read 2) was added to the recipe. Even though this solved sequencing issues in other CG neutral *piggyBac* libraries, the genomic AT bias in *P. falciparum* resulted in Illumina’s colour matrix calling errors. To eradicate these errors, the libraries were spiked with low (MiSeq: 10-20%) or higher (HiSeq: 50%) amounts of a well-defined CG neutral genomic library (i.e. PhiX).

**Generation of NF54 reference genome.** All *piggyBac* mutants were generated in the strain NF54, while the *P. falciparum* reference genome is generated from 3D7 ([Gardner et al. 2002](#_ENREF_3)). A reference genome of NF54 was therefore generated to increase the accuracy of insertion site calling. Illumina libraries of 400-500bp fragment length were generated using following the PCR-free protocol ([Kozarewa et al. 2009](#_ENREF_4)). Libraries were denatured, hybridized to the flow cell and loaded onto an Illumina Genome Analyzer IIX using the V4 SBS sequencing kit and a MiSeq. Around 18.5 million 75-bp reads, 22.3 millions 250bp reads and 23.5 millions 150bp reads were obtained with a fragment size of 300-450 bp, equating to 440x coverage of the *P. falciparum* 3D7 reference genome. All sequences were deposited in the short read archive (http://www.ebi.ac.uk/ena) with the accession number ERS184445.

An NF54 reference genome was generated using a morphing approach with ICORN ([Otto et al. 2010](#_ENREF_10)), transforming the 3D7 genome version 3 through iterative mapping and correcting into to the NF54 genome. ICORN was first run for seven iterations using the 75bp and 250bp reads, then for a further seven iterations using the 150bp reads and the bowtie2 settings ([Otto et al. 2010](#_ENREF_10)). In total 1280 one base pair corrections and 421 indel changes were made. To access the quality of the corrections we tested the mapping of the 75 and 250bp reads to the new reference using SNP-o-matic ([Manske and Kwiatkowski 2009](#_ENREF_7)). 97.27% of the bases were covered by at least 5 perfectly mapped reads in *Pf*NF54 versus 97.16% in *Pf*3D7, showing both the increased quality created by ICORN, as well as the close relationship between the two genomes. Finally, gene annotations were automatically transferred with RATT ([Otto et al. 2011](#_ENREF_9)) using the Assembly parameter. As reference we used the *P. falciparum* 3D7 reference from September of geneDB (ftp://ftp.sanger.ac.uk/pub/project/pathogens/malaria2/3D7/3D7.latest_version/version3/2014/September_2014/). The NF54 reference genome generated can be found at <ftp://ftp.sanger.ac.uk/pub/project/pathogens/Plasmodium/falciparum/NF54/Assembly/V1_morphed>.

**Insertion site identification**

We tested three mapping approaches, BWA ([Li and Durbin 2009](#_ENREF_6)) with default settings, bowtie2 with settings as for ICORN ([Langmead and Salzberg 2012](#_ENREF_5)) parameters -X 1200 --very-sensitive -N 1 -L 31 --rdg 5,2) and SMALT parameters -k 17 -s 3; -r 0 -y 0.95 (https://www.sanger.ac.uk/resources/software/smalt). Technical replicates were marked with MarkDuplicates from the Picard package http://broadinstitute.github.io/picard/. We compared the three mappers against the data from clones with known insertion sites (Table S3). BWA found the largest number of insertion site and with the highest number of reads for each site, so was selected for all subsequent analysis. Insertion sites were called if three not duplicated read pairs (technical replicates defined through MarkDuplicate) called the same insertion site. For the read count per se, we also included technical duplicates. Beside the raw count we also normalized the data by counting all the reads from QIseq insertion sites for each condition.

When multiplexing, cross contamination between index bar codes can sometimes occur, which could confound both site identification and site quantitation in mixed pools. To assess the possible impact of this, we counted how often we saw each insertion site in the known clone QIseq sequencing experiment. While we could observe a cross contamination with a ratio of up 0.5% between two individual indexes, we never observed a higher general cross contamination to all other indexes above 0.01 %. To compensate this possible error in the decoding of the bar codes, we set stringent cut-offs. For runs aimed at discovering new insertion sites, where there a fewer replicates of each individual site, insertion sites were ignored if they occurred below a cutoff of 1% of the total amount of read counts defining insertions in the run. For experiments with multiple samples and multiple insertion sites, which has the benefit of many in-built replicates, we set the cut-off to 0.05%. Custom scripts used for site identification are listed in Supplemental Methods S2.

**Analysis of Paralogs**

In this analysis we investigated the paralog gene number (paralog data of 10 *Plasmodium* species were downloaded from PlasmoDB <http://plasmodb.org/plasmo/>) of genes in the top and bottom quartiles of the growth assays on the 12th cycle. We performed the Fisher’s exact test for GO enrichment based on two samples (32 top or bottom quartile VS. 5510 genes in *P.* *falciparum* NF54) and adjusted the significant p value with multiple hypothesis testing to reduce the number of false positives. In addition, we performed a power test to understand the effect of the sample size in these studies. For sample size 32, Fisher’s exact test power analysis shows that most GO groups with gene number between 5 and 100 in the genome can be detected if there is an enrichment.

**SUPPLEMENTAL TABLE LEGENDS**

**Table S1**. Cloned *P. falciparum* lines used for QIseq experiments**,** specificity and mixed pool growth. 113 insertion sites with PB ID had been identified previously by PCR, 21 cases QIseq identified two *piggyBac* insertion sites rather than the single insertion site, 6 targeted PCR confirmed the presence of two integration sites in 6 lines 10.2, 16.2, 53.2, 69.2, 79.2, 116.2 (‘*’ Marked); 15- lines carrying additional insertion site listed at bottom (‘**’ marked), insertion sites confirmed in a large mixed pool growth assay (Table S6).

**Table S2**. Comparison of mapping approaches Information about the amount of reads per condition, including sequenced reads, mapped reads, read with QIseq insert, valid reads

**Table S3.** QIseq identification of insertion sites in uncloned *P. falciparum* pools. 19 transfected MPs (mixed populations) randomly selected and QIseq identified 254 *piggyBac* insertion sites across all fourteen chromosomes, parasites input vary in each MP 31,000, 62,000, 124,000 and 248,000, parasite input based on the number of transfected plate. More than 450 transfected MPs have been generated in a single round of transfection - ten 96-well microwell plates.

**Table S4**. QIseq parallel phenotyping of *P. falciparum* clones in a small mixed pool over 24 growth cycles (n=41), top quartile and bottom quartile highlighted in bold (n=10).

**Table S5.** QIseq parallel phenotyping of *P. falciparum* clones in a large mixed pool over 24 growth cycles (n=128), top quartile and bottom quartile highlighted in bold (n=32).

**Table S6.** Read accession numbers. All the reads of the experiments can be found under the following accession numbers in the European Nucleotide Archive (ENA).

**SUPPLEMENTAL REFERENCES**

Balu B, Chauhan C, Maher SP, Shoue DA, Kissinger JC, Fraser MJ, Jr., Adams JH. 2009. piggyBac is an effective tool for functional analysis of the Plasmodium falciparum genome. *BMC microbiology* **9**: 83.

Balu B, Singh N, Maher SP, Adams JH. 2010. A genetic screen for attenuated growth identifies genes crucial for intraerythrocytic development of Plasmodium falciparum. *PloS one* **5**(10): e13282.

Gardner MJ, Hall N, Fung E, White O, Berriman M, Hyman RW, Carlton JM, Pain A, Nelson KE, Bowman S et al. 2002. Genome sequence of the human malaria parasite Plasmodium falciparum. *Nature* **419**(6906): 498-511.

Kozarewa I, Ning Z, Quail MA, Sanders MJ, Berriman M, Turner DJ. 2009. Amplification-free Illumina sequencing-library preparation facilitates improved mapping and assembly of (G+C)-biased genomes. *Nature methods* **6**(4): 291-295.

Langmead B, Salzberg SL. 2012. Fast gapped-read alignment with Bowtie 2. *Nature methods* **9**(4): 357-359.

Li H, Durbin R. 2009. Fast and accurate short read alignment with Burrows-Wheeler transform. *Bioinformatics* **25**(14): 1754-1760.

Manske HM, Kwiatkowski DP. 2009. SNP-o-matic. *Bioinformatics* **25**(18): 2434-2435.

Moll K, Ljungström I, Perlmann H, Scherf A, Wahlgren M. 2008. Methods in Malaria Research, Fifth Edition. MR4/ATCC, Manassas, Virginia.

Otto TD, Dillon GP, Degrave WS, Berriman M. 2011. RATT: Rapid Annotation Transfer Tool. *Nucleic acids research* **39**(9): e57.

Otto TD, Sanders M, Berriman M, Newbold C. 2010. Iterative Correction of Reference Nucleotides (iCORN) using second generation sequencing technology. *Bioinformatics* **26**(14): 1704-1707.

Uren AG, Mikkers H, Kool J, van der Weyden L, Lund AH, Wilson CH, Rance R, Jonkers J, van Lohuizen M, Berns A et al. 2009. A high-throughput splinkerette-PCR method for the isolation and sequencing of retroviral insertion sites. *Nature protocols* **4**(5): 789-798.
