# Supplementary material for: Quantitative insertion-site sequencing (QIseq) for high throughput phenotyping of transposon mutants
Source: HighWire-hosted journal article supplement (doi:10.1101/gr.200279.115), 2016-05-10
Supplement: Supplemental_Table_S1.xlsx [file Supplemental_Table_S1.xlsx]

## Sheet: Table S1_Known pB clones
Supplemental Table S1. Cloned P. falciparum lines used for QIseq experiments, specificity and mixed pool growth
113 insertion sites with PB ID had been identified previously by PCR, 21 cases QIseq identified two piggyBac insertion sites rather than the single insertion site,
6 targeted PCR confirmed the presence of two integration sites in 6 lines 10.2, 16.2, 53.2, 69.2, 79.2, 116.2 (‘*’ Marked);
15- lines carrying additional insertion site listed at bottom (‘**’ marked), insertion sites confirmed in a large mixed pool growth assay (Table S5).
PB ID	Insertion site	Run Small pool growth	Run large pool growth	Gene_ID_13.0	Gene_Chr	Gene_Start	Gene_End	Inseration_site	Gene_strand	Distance to gene
1	PfNF54_08_m1::568855	1	1	PF3D7_0811300	chr8	567824	573148	568855	+	0
2	PfNF54_13_m1::271629	1	1	PF3D7_1305500	chr13	271411	273726	271629	+	0
3	PfNF54_06_m1::667365	1	1	PF3D7_0615900	chr6	662435	667855	667365	-	0
4	PfNF54_11_m1::879695	1	1	PF3D7_1122900	chr11	878969	895273	879695	+	0
5	PfNF54_11_m1::1676856	1	1	PF3D7_1141900	chr11	1676255	1677769	1676856	-	0
6	PfNF54_14_m1::3116484	1	1	PF3D7_1475700	chr14	3117392	3118951	3116484	+	908
7	PfNF54_02_m1::451759	1	1	PF3D7_0211100	chr2	451751	455116	451759	+	0
8	PfNF54_02_m1::142289		1	PF3D7_0203000	chr2	141625	147564	142289	-	0
9	PfNF54_04_m1::250802	1	1	PF3D7_0404600	chr4	247731	260147	250802	+	0
10.1	PfNF54_04_m1::34709	1	1	PF3D7_0400100	chr4	28706	37677	34709	+	0
10.2*	PfNF54_06_m1::1119286	1	1	PF3D7_0627900	chr6	1119587	1120858	1119286	+	301
11	PfNF54_04_m1::724234	1	1	PF3D7_0416500	chr4	723073	724242	724234	-	0
12	PfNF54_10_m1::733690	1	1	PF3D7_1018300	chr10	729809	732856	733690	-	-834
13	PfNF54_13_m1::2406699		1	PF3D7_1360200	chr13	2406838	2408385	2406699	-	139
14	PfNF54_05_m1::516248	1	1	PF3D7_0511500	chr5	486602	516787	516248	+	0
15	PfNF54_06_m1::498591	1	1	PF3D7_0611800	chr6	490858	501140	498591	-	0
16.1	PfNF54_06_m1::841186	1	1	PF3D7_0619900	chr6	840523	841224	841186	+	0
16.2*	PfNF54_05_m1::1296386	1	1	PF3D7_0532000	chr5	1292410	1296199	1296386	+	-187
17	PfNF54_05_m1::889784	1	1	PF3D7_0521900	chr5	888657	895144	889784	+	0
18	PfNF54_12_m1::769606	1	1	PF3D7_1219300	chr12	766654	774197	769606	-	0
19	PfNF54_11_m1::1302725	1	1	PF3D7_1133700	chr11	1302173	1305987	1302725	+	0
20	PfNF54_08_m1::446344	1	1	PF3D7_0808700	chr8	440408	448062	446344	+	0
21	PfNF54_11_m1::1404540	1	1	PF3D7_1136000	chr11	1403906	1414512	1404540	+	0
22	PfNF54_09_m1::1250793	1	1	PF3D7_0931000	chr9	1248866	1251601	1250793	-	0
23	PfNF54_08_m1::1318070	1	1	PF3D7_0830900	chr8	1317600	1318341	1318070	-	0
24	PfNF54_12_m1::1319997	1	1	PF3D7_1231800	chr12	1314696	1320170	1319997	+	0
25	PfNF54_10_m1::1422622	1	1	PF3D7_1035800	chr10	1420533	1422671	1422622	+	0
26	PfNF54_14_m1::1812894	1	1	PF3D7_1444100	chr14	1801961	1825326	1812894	-	0
28	PfNF54_11_m1::1544148	1	1	PF3D7_1138900	chr11	1540804	1544163	1544148	+	0
29	PfNF54_14_m1::1703121		1	PF3D7_1441800	chr14	1702609	1703809	1703121	-	0
30	PfNF54_13_m1::1833303	1	1	PF3D7_1345800	chr13	1831842	1834991	1833303	+	0
31	PfNF54_14_m1::1281184	1	1	PF3D7_1432400	chr14	1275899	1282645	1281184	-	0
32	PfNF54_08_m1::896251			PF3D7_0819800	chr8	891658	898502	896251	-	0
33	PfNF54_12_m1::356310	1	1	PF3D7_1207800	chr12	354540	357446	356310	-	0
34	PfNF54_11_m1::1739772	1	1	PF3D7_1143500	chr11	1737256	1740029	1739772	-	0
35	PfNF54_10_m1::92206		1	PF3D7_1001700	chr10	92573	93526	92206	-	367
37	PfNF54_13_m1::510072		1	PF3D7_1311900	chr13	507900	509735	510072	+	-337
38	PfNF54_10_m1::1417438		1	PF3D7_1035700	chr10	1413200	1415293	1417438	+	-2145
39	PfNF54_11_m1::141915		1	PF3D7_1103100	chr11	140048	140801	141915	-	-1114
40	PfNF54_08_m1::710781		1	PF3D7_0815000	chr8	709333	710600	710781	-	-181
42	PfNF54_12_m1::648182		1	PF3D7_1216100	chr12	646979	647860	648182	+	-322
43	PfNF54_02_m1::246992	1	1	PF3D7_0206100	chr2	245358	246699	246992	+	-293
44	PfNF54_13_m1::2095408		1	PF3D7_1352600	chr13	2096326	2099369	2095408	-	918
45	PfNF54_12_m1::1092023		1	PF3D7_1227000	chr12	1092160	1092651	1092023	-	137
47	PfNF54_14_m1::1277361		1	PF3D7_1432400	chr14	1275899	1282645	1277361	-	0
48	PfNF54_13_m1::1758853		1	PF3D7_1344000	chr13	1759466	1761991	1758853	+	613
49	PfNF54_13_m1::1212674		1	PF3D7_1328700	chr13	1213394	1213615	1212674	+	720
50	PfNF54_11_m1::1532518		1	PF3D7_1138800	chr11	1533252	1539856	1532518	-	734
51	PfNF54_13_m1::1138368		1	PF3D7_1327100	chr13	1138558	1141561	1138368	-	190
52	PfNF54_11_m1::1445642		1	PF3D7_1136600	chr11	1441503	1445471	1445642	+	-171
53.1	PfNF54_12_m1::46222		1	PF3D7_1200600	chr12	46788	56805	46222	-	566
53.2*	PfNF54_09_m1::52076		1	PF3D7_0900800	chr9	52648	54020	52076	-	572
54	PfNF54_09_m1::99320	1	1	PF3D7_0902200	chr9	98175	100339	99320	-	0
55	PfNF54_07_m1::1156274		1	PF3D7_0727200	chr7	1156748	1158409	1156274	-	474
56	PfNF54_01_m1::229890			PF3D7_0105500	chr1	228485	229519	229890	-	-371
57	PfNF54_11_m1::1023203		1	PF3D7_1126200	chr11	1023790	1024496	1023203	-	587
58	PfNF54_13_m1::1728031		1	PF3D7_1343700	chr13	1724817	1726997	1728031	-	-1034
60	PfNF54_13_m1::1284702		1	PF3D7_1330500	chr13	1284988	1287165	1284702	+	286
61	PfNF54_13_m1::1694959		1	PF3D7_1342900	chr13	1682393	1693969	1694959	-	-990
62	PfNF54_13_m1::115505		1	PF3D7_1302000	chr13	112792	113815	115505	-	-1690
63	PfNF54_02_m1::168158		1	PF3D7_0203600	chr2	166144	168051	168158	+	-107
64	PfNF54_11_m1::351780		1	PF3D7_1108000	chr11	352556	354262	351780	+	776
65	PfNF54_06_m1::253817		1	PF3D7_0606000	chr6	250612	253803	253817	-	-14
66	PfNF54_06_m1::607866		1	PF3D7_0614500	chr6	606142	607259	607866	-	-607
67	PfNF54_02_m1::170489		1	PF3D7_0203700	chr2	168682	170136	170489	-	-353
68	PfNF54_06_m1::77404		1	PF3D7_0601900	chr6	78190	78784	77404	+	786
69.1	PfNF54_05_m1::1012936		1	PF3D7_0524400	chr5	1013453	1014550	1012936	-	517
69.2*	PfNF54_06_m1::530075		1	PF3D7_0612800	chr6	528060	529175	530075	-	-900
71	PfNF54_10_m1::100751		1	PF3D7_1001900	chr10	99379	100361	100751	-	-390
72	PfNF54_14_m1::373820		1	PF3D7_1409500	chr14	370146	373006	373820	+	-814
73	PfNF54_09_m1::698767		1	PF3D7_0916700	chr9	696863	698029	698767	-	-738
74	PfNF54_04_m1::116369			PF3D7_0402000	chr4	114601	116058	116369	-	-311
76	PfNF54_14_m1::1330867		1	PF3D7_1433400	chr14	1312304	1329577	1330867	-	-1290
77	PfNF54_03_m1::930071		1	PF3D7_0322100	chr3	930640	932415	930071	-	569
78	PfNF54_06_m1::979252		1	PF3D7_0623900	chr6	977183	978049	979252	+	-1203
79.1	PfNF54_01_m1::146981		1	PF3D7_0103300	chr1	143640	146396	146981	-	-585
79.2*	PfNF54_14_m1::1370157		1	PF3D7_1434200	chr14	1368815	1369796	1370157	-	-361
80	PfNF54_10_m1::532345		1	PF3D7_1013600	chr10	533109	539825	532345	+	764
81	PfNF54_13_m1::2020022		1	PF3D7_1350500	chr13	2015367	2018801	2020022	-	-1221
82	PfNF54_12_m1::306444		1	PF3D7_1206800	chr12	308214	310397	306444	+	1770
83	PfNF54_14_m1::249419		1	PF3D7_1406900	chr14	251059	252826	249419	+	1640
84	PfNF54_12_m1::845511		1	PF3D7_1221000	chr12	836912	843901	845511	-	-1610
85	PfNF54_09_m1::699679		1	PF3D7_0916700	chr9	696863	698029	699679	-	-1650
87	PfNF54_08_m1::625232		1	PF3D7_0812500	chr8	626069	628945	625232	-	837
91	PfNF54_14_m1::1359496		1	PF3D7_1433900	chr14	1360002	1364558	1359496	+	506
92	PfNF54_04_m1::659953		1	PF3D7_0414600	chr4	658620	659538	659953	-	-415
94	PfNF54_01_m1::395817		1	PF3D7_0110500	chr1	396591	403606	395817	+	774
95	PfNF54_02_m1::109046		1	PF3D7_0202100	chr2	109564	110580	109046	-	518
96	PfNF54_12_m1::342678		1	PF3D7_1207300	chr12	343326	344361	342678	-	648
97	PfNF54_04_m1::290343		1	PF3D7_0405400	chr4	291251	300976	290343	+	908
98	PfNF54_08_m1::389064		1	PF3D7_0807600	chr8	389596	394259	389064	-	532
99	PfNF54_13_m1::1891837		1	PF3D7_1347200	chr13	1889853	1891121	1891837	-	-716
100	PfNF54_14_m1::1182677		1	PF3D7_1430000	chr14	1181664	1182982	1182677	-	0
101	PfNF54_03_m1::527173			PF3D7_0312400	chr3	524154	526439	527173	-	-734
102	PfNF54_13_m1::672107		1	PF3D7_1316000	chr13	668360	670745	672107	-	-1362
103	PfNF54_06_m1::186830		1	PF3D7_0604400	chr6	184892	185843	186830	+	-987
104	PfNF54_01_m1::186648		1	PF3D7_0104200	chr1	182822	184222	186648	-	-2426
105	PfNF54_13_m1::1369625		1	PF3D7_1333400	chr13	1370083	1370799	1369625	+	458
106	PfNF54_11_m1::1567137		1	PF3D7_1139300	chr11	1556744	1565045	1567137	-	-2092
107	PfNF54_05_m1::220076		1	PF3D7_0505100	chr5	220839	229253	220076	+	763
108	PfNF54_12_m1::2131213		1	PF3D7_1252300	chr12	2128400	2128786	2131213	-	-2427
109	PfNF54_14_m1::2154633		1	PF3D7_1452500	chr14	2151823	2153614	2154633	-	-1019
110	PfNF54_09_m1::1507053		1	PF3D7_0937800	chr9	1495579	1503336	1507053	-	-3717
111	PfNF54_10_m1::216125	1	1	PF3D7_1004600	chr10	215717	219759	216125	+	0
112	PfNF54_07_m1::1336930		1	PF3D7_0731000	chr7	1333175	1334938	1336930	-	-1992
113	PfNF54_07_m1::1366070		1	PF3D7_0731600	chr7	1368161	1370596	1366070	+	2091
114	PfNF54_06_m1::1373882		1	PF3D7_0632800	chr6	1374797	1382627	1373882	-	915
115	PfNF54_12_m1::1137689	1		PF3D7_1227800	chr12	1134370	1137648	1137689	-	-41
116.1	PfNF54_14_m1::1476670		1	PF3D7_1436200	chr14	1467629	1474438	1476670	-	-2232
116.2*	PfNF54_09_m1::831572		1	PF3D7_0920300	chr9	831669	832648	831572	+	97
119	PfNF54_06_m1::1257230		1	PF3D7_0630100	chr6	1254907	1256940	1257230	-	-290
120	PfNF54_14_m1::2436451	1	1	PF3D7_1459500	chr14	2436695	2439616	2436451	+	244
121	PfNF54_05_m1::965601	1	1	PF3D7_0523200	chr5	966123	969737	965601	+	522
122	PfNF54_07_m1::1090517	1	1	PF3D7_0726000	chr7	1086570	1090357	1090517	+	-160
123	PfNF54_14_m1::450635	1	1	PF3D7_1411100.1	chr14	447923	449968	450635	-	-667
124	PfNF54_07_m1::1367266	1	1	PF3D7_0731600	chr7	1368161	1370596	1367266	+	895
125	PfNF54_06_m1::933481	1	1	PF3D7_0622900	chr6	925105	931074	933481	-	-2407
126	PfNF54_13_m1::1412492		1	PF3D7_1334800	chr13	1413102	1413947	1412492	-	610
59	PfNF54_14_m1::1027315		1	PF3D7_1426400	chr14	1026262	1027144	1027315	-	-171
A1**	PfNF54_02_m1::35355		1	PF3D7_0200300	chr2	35927	37249	35355	-	572
A2**	PfNF54_03_m1::297013		1	PF3D7_0306300	chr3	295107	296094	297013	-	-919
A3**	PfNF54_07_m1::215219		1	PF3D7_0704600	chr7	216024	229072	215219	-	805
A4**	PfNF54_07_m1::252067		1	PF3D7_0705100	chr7	252282	255251	252067	+	215
A5**	PfNF54_09_m1::753068		1	PF3D7_0918300	chr9	751358	752422	753068	-	-646
A6**	PfNF54_10_m1::664393		1	PF3D7_1016500	chr10	661742	664201	664393	-	-192
A7**	PfNF54_10_m1::71373		1	PF3D7_1001200	chr10	70547	70819	71373	-	-554
A8**	PfNF54_11_m1::1855678		1	PF3D7_1146900	chr11	1856390	1857656	1855678	+	712
A9**	PfNF54_11_m1::686002		1	PF3D7_1118100	chr11	687235	687781	686002	+	1233
A10**	PfNF54_12_m1::2113755			PF3D7_1252000	chr12	2113730	2113801	2113755	-	0
A11**	PfNF54_13_m1::1848524		1	PF3D7_1346300	chr13	1849528	1850517	1848524	+	1004
A12**	PfNF54_13_m1::2736986		1	PF3D7_1368800	chr13	2731041	2736143	2736986	-	-843
A13**	PfNF54_13_m1::59525		1	PF3D7_1300800	chr13	60097	61172	59525	-	572
A14**	PfNF54_14_m1::1339844		1	PF3D7_1433600	chr14	1341689	1342289	1339844	+	1845
A15**	PfNF54_14_m1::1855981		1	PF3D7_1445200	chr14	1856700	1859308	1855981	+	719
	SUM	41	128
Note:
1) Distance '-' means gene have relative lower(start, end) sites.
2) Distance '+' means gene have relative higher(start, end) sites.
3) When distance is 0, it means mutant locates on gene body, only one gene is listed
