# Supplementary material for: Quantitative insertion-site sequencing (QIseq) for high throughput phenotyping of transposon mutants
Source: HighWire-hosted journal article supplement (doi:10.1101/gr.200279.115), 2016-05-10
Supplement: Supplemental_Table_S2.xlsx [file Supplemental_Table_S2.xlsx]

## Sheet: Table S2_mapperComparison
Supplemental Table S2. Comparison of three mappers with the known piggyBac inserts.
Comparison of mapping approaches Information about the amount of reads per condition, including sequenced reads, mapped reads, read with QIseq insert, valid reads.
																													86.7128					86.6489					85.2872
						88.2931	0.97283	Sum	8041	90				8037	90				7950	89						88.1792	0.97449		8151	91				8145	91				8017	90
				Stats.10968_bwa.txt						Stats.10968_bowtie.txt					Stats.10986_smalt.txt									Stats.10968_bwa.txt						Stats.10968_bowtie.txt					Stats.10986_smalt.txt
Sample		ID	ID	reads	mapped	%	Read Tradis	ok	%	reads	mapped	Read Tradis	ok	%	reads	mapped	Read Tradis	ok	%	diff 1- 2	diff 1-3	dif 2 -3	ID	reads	mapped	%	Read Tradis	ok	%	reads	mapped	Read Tradis	ok	%	reads	mapped	Read Tradis	ok	%	diff 1- 2	diff 1-3	dif 2 -3
unknown_MP1	A1	1	10986_1#1	116088	113912	0.981256	58044	54982	94	116088	113912	58044	54954	94	116088	113912	58044	55173	95	0	1	1	11014_1#1	225436	220880	0.97979	112718	105555	93	225436	220880	112718	105635	93	225436	220880	112718	105771	93	0	0	0
unknown_MP9	A2	2	10986_1#2	72540	70545	0.972498	36270	33240	91	72540	70545	36270	33004	90	72540	70545	36270	32650	90	1	1	0	11014_1#2	160714	147783	0.91954	80357	69074	85	160714	147783	80357	68905	85	160714	147783	80357	68907	85	0	0	0
unknown_MP17	A3	3	10986_1#3	83116	80973	0.974217	41558	36286	87	83116	80973	41558	36417	87	83116	80973	41558	36542	87	0	0	0	11014_1#3	185500	181623	0.9791	92750	85322	91	185500	181623	92750	85390	92	185500	181623	92750	85320	91	1	0	1
PB-3 + PB-111(1:10)	A4	4	10986_1#4	75568	74210	0.982029	37784	32801	86	75568	74210	37784	32617	86	75568	74210	37784	32356	85	0	1	1	11014_1#4	189720	187808	0.989922	94860	87593	92	189720	187808	94860	87623	92	189720	187808	94860	87782	92	0	0	0
PB-3 + PB-60 (1:1,000)	A5	5	10986_1#5	37714	35283	0.935541	18857	15311	81	37714	35283	18857	15835	83	37714	35283	18857	16320	86	2	5	3	11014_1#5	159750	149632	0.936664	79875	73358	91	159750	149632	79875	77249	96	159750	149632	79875	75113	94	5	3	2
Small pool growth -6 cycles #2	A6	6	10986_1#6	123636	116761	0.944393	61818	50531	81	123636	116761	61818	50522	81	123636	116761	61818	50529	81	0	0	0	11014_1#6	200308	190290	0.949987	100154	83711	83	200308	190290	100154	83707	83	200308	190290	100154	83039	82	0	1	1
PB-20 + PB-21	A7	7	10986_1#7	209242	135975	0.649846	104621	62714	59	209242	135975	104621	63008	60	209242	135975	104621	63621	60	1	1	0	11014_1#7	415922	307642	0.739663	207961	144844	69	415922	307642	207961	144798	69	415922	307642	207961	143099	68	0	1	1
PB-40 + PB-41	A8	8	10986_1#8	110796	103434	0.933554	55398	48248	87	110796	103434	55398	48083	86	110796	103434	55398	50025	90	1	3	4	11014_1#8	181610	177073	0.975018	90805	82973	91	181610	177073	90805	82335	90	181610	177073	90805	78040	85	1	6	5
PB-120 + PB-61	A9	9	10986_1#9	173304	167608	0.967133	86652	81148	93	173304	167608	86652	81602	94	173304	167608	86652	81902	94	1	1	0	11014_1#9	278178	272569	0.979837	139089	132772	95	278178	272569	139089	131757	94	278178	272569	139089	127856	91	1	4	3
PB-77 + PB-78	A10	10	10986_1#10	87524	86133	0.984107	43762	38673	88	87524	86133	43762	38740	88	87524	86133	43762	38636	88	0	0	0	11014_1#10	143906	140431	0.975852	71953	61957	86	143906	140431	71953	62002	86	143906	140431	71953	62198	86	0	0	0
PB-124 + PB-94	A11	11	10986_1#11	86778	84363	0.97217	43389	40501	93	86778	84363	43389	39995	92	86778	84363	43389	38939	89	1	4	3	11014_1#11	175568	172605	0.983123	87784	81681	93	175568	172605	87784	82204	93	175568	172605	87784	82313	93	0	0	0
PB-109 + PB-110	A12	12	10986_1#12	123636	122183	0.988248	61818	56310	91	123636	122183	61818	56377	91	123636	122183	61818	56382	91	0	0	0	11014_1#12	164972	162417	0.984513	82486	74630	90	164972	162417	82486	74615	90	164972	162417	82486	74098	89	0	1	1
unknown_MP2	B1	13	10986_1#13	97606	92205	0.944665	48803	38611	79	97606	92205	48803	38701	79	97606	92205	48803	38610	79	0	0	0	11014_1#13	183922	176393	0.959064	91961	80238	87	183922	176393	91961	79966	86	183922	176393	91961	79483	86	1	1	0
unknown_MP10	B2	14	10986_1#14	181930	178477	0.98102	90965	82880	91	181930	178477	90965	82668	90	181930	178477	90965	82514	90	1	1	0	11014_1#14	205454	197033	0.959013	102727	88562	86	205454	197033	102727	87877	85	205454	197033	102727	82863	80	1	6	5
unknown_MP18	B3	15	10986_1#15	133634	126879	0.949451	66817	53778	80	133634	126879	66817	53532	80	133634	126879	66817	53130	79	0	1	1	11014_1#15	161302	126468	0.784045	80651	48256	59	161302	126468	80651	48360	59	161302	126468	80651	49069	60	0	1	1
PB-3 + PB-112 (1:10)	B4	16	10986_1#16	89538	83643	0.934162	44769	34983	78	89538	83643	44769	34950	78	89538	83643	44769	35271	78	0	0	0	11014_1#16	265780	257973	0.970626	132890	117160	88	265780	257973	132890	117268	88	265780	257973	132890	115982	87	0	1	1
PB-3 + PB-117 (1:10,000)	B5	17	10986_1#17	81158	80344	0.98997	40579	37906	93	81158	80344	40579	37882	93	81158	80344	40579	37936	93	0	0	0	11014_1#17	160056	158226	0.988567	80028	75345	94	160056	158226	80028	75268	94	160056	158226	80028	75107	93	0	1	1
Small pool growth -6 cycles #3	B6	18	10986_1#18	81240	76934	0.946997	40620	35633	87	81240	76934	40620	35647	87	81240	76934	40620	35743	87	0	0	0	11014_1#18	162684	156840	0.964078	81342	72971	89	162684	156840	81342	72963	89	162684	156840	81342	72472	89	0	0	0
PB-22 + PB-23	B7	19	10986_1#19	93142	92186	0.989736	46571	44832	96	93142	92186	46571	44814	96	93142	92186	46571	44828	96	0	0	0	11014_1#19	153006	150573	0.984099	76503	73304	95	153006	150573	76503	73233	95	153006	150573	76503	72894	95	0	0	0
PB-125 + PB-44	B8	20	10986_1#20	72940	70169	0.96201	36470	30601	83	72940	70169	36470	30576	83	72940	70169	36470	30841	84	0	1	1	11014_1#20	187154	184404	0.985306	93577	88455	94	187154	184404	93577	88067	94	187154	184404	93577	87040	93	0	1	1
PB-62 + PB-63	B9	21	10986_1#21	190344	188002	0.987696	95172	91994	96	190344	188002	95172	92005	96	190344	188002	95172	92130	96	0	0	0	11014_1#21	190082	187417	0.98598	95041	91841	96	190082	187417	95041	91893	96	190082	187417	95041	92026	96	0	0	0
PB-79 + PB-80	B10	22	10986_1#22	130	95	0.730769	65	20	30	130	95	65	20	30	130	95	65	19	29	0	1	1	11014_1#22	207646	132716	0.639145	103823	56978	54	207646	132716	103823	56909	54	207646	132716	103823	56491	54	0	0	0
PB-95 + PB-96	B11	23	10986_1#23	101820	49089	0.482115	50910	23260	45	101820	49089	50910	23278	45	101820	49089	50910	23557	46	0	1	1	11014_1#23	183642	109386	0.595648	91821	51554	56	183642	109386	91821	51550	56	183642	109386	91821	51667	56	0	0	0
PB-121 + PB-122	B12	24	10986_1#24	85862	83048	0.967226	42931	31943	74	85862	83048	42931	37564	87	85862	83048	42931	38023	88	13	14	1	11014_1#24	160704	156593	0.974419	80352	72706	90	160704	156593	80352	72708	90	160704	156593	80352	72879	90	0	0	0
unknown_MP3	C1	25	10986_1#25	307970	299705	0.973163	153985	143637	93	307970	299705	153985	145182	94	307970	299705	153985	135592	88	1	5	6	11014_1#25	183310	175394	0.956816	91655	80160	87	183310	175394	91655	80584	87	183310	175394	91655	80261	87	0	0	0
unknown_MP11	C2	27	10986_1#27	75684	74738	0.987501	37842	34713	91	75684	74738	37842	34548	91	75684	74738	37842	33858	89	0	2	2	11014_1#27	167462	162214	0.968662	83731	72404	86	167462	162214	83731	72643	86	167462	162214	83731	73408	87	0	1	1
unknown_MP19	C3	28	10986_1#28	93348	88767	0.950926	46674	39856	85	93348	88767	46674	40166	86	93348	88767	46674	40113	85	1	0	1	11014_1#28	164856	144732	0.87793	82428	64825	78	164856	144732	82428	64874	78	164856	144732	82428	65075	78	0	0	0
PB-3 + PB-113 (1:10)	C4	29	10986_1#29	62572	61106	0.976571	31286	28261	90	62572	61106	31286	28286	90	62572	61106	31286	28384	90	0	0	0	11014_1#29	150850	149043	0.988021	75425	70163	93	150850	149043	75425	70212	93	150850	149043	75425	70128	92	0	1	1
PB-3 + PB-11(1:10,000)	C5	30	10986_1#30	65936	61326	0.930084	32968	27755	84	65936	61326	32968	27522	83	65936	61326	32968	28265	85	1	1	2	11014_1#30	174814	170344	0.97443	87407	83393	95	174814	170344	87407	82635	94	174814	170344	87407	68723	78	1	17	16
Small pool growth -12 cycles #1	C6	31	10986_1#31	79728	71103	0.89182	39864	31303	78	79728	71103	39864	31303	78	79728	71103	39864	31291	78	0	0	0	11014_1#31	159552	129413	0.811102	79776	56123	70	159552	129413	79776	56088	70	159552	129413	79776	55771	69	0	1	1
PB-24 + PB-25	C7	33	10986_1#33	96334	94615	0.982156	48167	45631	94	96334	94615	48167	45714	94	96334	94615	48167	46208	95	0	1	1	11014_1#33	178244	176469	0.990042	89122	84262	94	178244	176469	89122	85536	95	178244	176469	89122	85486	95	1	1	0
PB-45 + PB-15	C8	34	10986_1#34	71364	70310	0.985231	35682	32079	89	71364	70310	35682	32061	89	71364	70310	35682	32173	90	0	1	1	11014_1#34	282326	277336	0.982325	141163	130716	92	282326	277336	141163	130178	92	282326	277336	141163	127100	90	0	2	2
PB-64 + PB-65	C9	35	10986_1#35	81156	58493	0.720748	40578	28204	69	81156	58493	40578	28253	69	81156	58493	40578	27717	68	0	1	1	11014_1#35	165624	41830	0.25256	82812	17402	21	165624	41830	82812	17389	20	165624	41830	82812	16026	19	1	2	1
PB-81 + PB-82	C10	36	10986_1#36	86748	83358	0.960921	43374	39448	90	86748	83358	43374	39472	91	86748	83358	43374	38596	88	1	2	3	11014_1#36	173138	170367	0.983995	86569	80876	93	173138	170367	86569	80831	93	173138	170367	86569	80878	93	0	0	0
PB-97 + PB-98	C11	37	10986_1#37	65080	64539	0.991687	32540	31644	97	65080	64539	32540	31625	97	65080	64539	32540	31099	95	0	2	2	11014_1#37	168274	163039	0.96889	84137	79057	93	168274	163039	84137	78988	93	168274	163039	84137	79663	94	0	1	1
PB-123 +PB-38	C12	38	10986_1#38	101744	100004	0.982898	50872	45399	89	101744	100004	50872	45366	89	101744	100004	50872	45706	89	0	0	0	11014_1#38	171184	167331	0.977492	85592	74829	87	171184	167331	85592	76167	88	171184	167331	85592	74251	86	1	1	2
unknown_MP4	D1	39	10986_1#39	153356	148895	0.970911	76678	72117	94	153356	148895	76678	72082	94	153356	148895	76678	72199	94	0	0	0	11014_1#39	196426	181263	0.922806	98213	85753	87	196426	181263	98213	86335	87	196426	181263	98213	86010	87	0	0	0
unknown_MP12	D2	40	10986_1#40	86912	86075	0.99037	43456	41710	95	86912	86075	43456	41604	95	86912	86075	43456	41308	95	0	0	0	11014_1#40	176600	167363	0.947695	88300	79613	90	176600	167363	88300	78329	88	176600	167363	88300	75212	85	2	5	3
Small pool growth -15 cycles #3	D3	41	10986_1#41	157398	151923	0.965216	78699	69571	88	157398	151923	78699	69584	88	157398	151923	78699	69733	88	0	0	0	11014_1#41	216724	210340	0.970543	108362	96693	89	216724	210340	108362	96711	89	216724	210340	108362	96316	88	0	1	1
PB-3 + PB-6 (1:100)	D4	42	10986_1#42	91528	57924	0.632856	45764	23297	50	91528	57924	45764	23083	50	91528	57924	45764	22669	49	0	1	1	11014_1#42	146916	137466	0.935678	73458	57369	78	146916	137466	73458	53982	73	146916	137466	73458	37473	51	5	27	22
PB-3 + PB-42 (1:10,000)	D5	43	10986_1#43	55016	45554	0.828014	27508	11666	42	55016	45554	27508	12261	44	55016	45554	27508	12613	45	2	3	1	11014_1#43	161876	153434	0.947849	80938	64980	80	161876	153434	80938	63478	78	161876	153434	80938	60779	75	2	5	3
PB-4 + PB-5	D6	44	10986_1#44	70248	69021	0.982533	35124	31995	91	70248	69021	35124	31933	90	70248	69021	35124	31742	90	1	1	0	11014_1#44	134394	130856	0.973674	67197	60131	89	134394	130856	67197	59949	89	134394	130856	67197	59307	88	0	1	1
PB-26 + PB-126	D7	45	10986_1#45	127604	125848	0.986239	63802	58453	91	127604	125848	63802	58431	91	127604	125848	63802	58646	91	0	0	0	11014_1#45	276864	273139	0.986546	138432	129802	93	276864	273139	138432	129885	93	276864	273139	138432	129970	93	0	0	0
PB-118 + PB-50	D8	46	10986_1#46	83342	81310	0.975619	41671	35624	85	83342	81310	41671	35574	85	83342	81310	41671	35860	86	0	1	1	11014_1#46	144450	133413	0.923593	72225	60264	83	144450	133413	72225	62086	85	144450	133413	72225	58624	81	2	2	4
PB-66 + PB-67	D9	47	10986_1#47	73074	71496	0.978405	36537	32597	89	73074	71496	36537	32556	89	73074	71496	36537	32836	89	0	0	0	11014_1#47	147604	142388	0.964662	73802	67954	92	147604	142388	73802	67184	91	147604	142388	73802	63010	85	1	7	6
PB-83 + PB-84	D10	48	10986_1#48	77676	76715	0.987628	38838	37507	96	77676	76715	38838	33599	86	77676	76715	38838	28530	73	10	23	13	11014_1#48	174064	171277	0.983989	87032	83347	95	174064	171277	87032	84464	97	174064	171277	87032	83440	95	2	0	2
PB-99+ PB-100	D11	49	10986_1#49	76714	75827	0.988438	38357	35398	92	76714	75827	38357	34451	89	76714	75827	38357	33169	86	3	6	3	11014_1#49	180682	177990	0.985101	90341	80870	89	180682	177990	90341	80800	89	180682	177990	90341	80644	89	0	0	0
PB-27 + PB-3	D12	50	10986_1#50	74120	51005	0.688141	37060	23146	62	74120	51005	37060	22994	62	74120	51005	37060	22435	60	0	2	2	11014_1#50	164842	109058	0.661591	82421	51643	62	164842	109058	82421	51653	62	164842	109058	82421	51325	62	0	0	0
unknown_MP5	E1	51	10986_1#51	156466	152988	0.977772	78233	73671	94	156466	152988	78233	73603	94	156466	152988	78233	73907	94	0	0	0	11014_1#51	187784	177781	0.946731	93892	84933	90	187784	177781	93892	84828	90	187784	177781	93892	84364	89	0	1	1
unknown_MP13	E2	52	10986_1#52	90994	89750	0.986329	45497	42502	93	90994	89750	45497	42402	93	90994	89750	45497	42394	93	0	0	0	11014_1#52	180772	177964	0.984467	90386	82920	91	180772	177964	90386	82840	91	180772	177964	90386	82712	91	0	0	0
PB-3 + PB-33 (1:100)	E3	53	10986_1#53	194926	192421	0.987149	97463	93640	96	194926	192421	97463	93637	96	194926	192421	97463	94130	96	0	0	0	11014_1#53	379796	374942	0.987219	189898	179908	94	379796	374942	189898	179970	94	379796	374942	189898	179963	94	0	0	0
PB-3 + PB-7 (1:100)	E4	54	10986_1#54	46914	46087	0.982372	23457	21687	92	46914	46087	23457	21690	92	46914	46087	23457	21757	92	0	0	0	11014_1#54	191818	189083	0.985742	95909	89867	93	191818	189083	95909	89976	93	191818	189083	95909	89797	93	0	0	0
Small pool growth -3 cycles #1	E5	55	10986_1#55	84236	79401	0.942602	42118	38303	90	84236	79401	42118	38304	90	84236	79401	42118	38246	90	0	0	0	11014_1#55	229152	220094	0.960472	114576	106712	93	229152	220094	114576	106516	92	229152	220094	114576	105127	91	1	2	1
PB-9 + PB-19	E6	56	10986_1#56	112322	111190	0.989922	56161	52970	94	112322	111190	56161	52954	94	112322	111190	56161	53148	94	0	0	0	11014_1#56	170142	168561	0.990708	85071	80855	95	170142	168561	85071	80888	95	170142	168561	85071	80765	94	0	1	1
PB-28 + PB-30	E7	57	10986_1#57	73034	72191	0.988457	36517	35054	95	73034	72191	36517	35030	95	73034	72191	36517	35084	96	0	1	1	11014_1#57	160978	158842	0.986731	80489	76583	95	160978	158842	80489	76550	95	160978	158842	80489	76646	95	0	0	0
PB-51 + PB-52	E8	58	10986_1#58	44334	43692	0.985519	22167	20823	93	44334	43692	22167	20128	90	44334	43692	22167	18912	85	3	8	5	11014_1#58	197790	193878	0.980221	98895	89954	90	197790	193878	98895	89922	90	197790	193878	98895	90382	91	0	1	1
PB-68 + PB-70	E9	59	10986_1#59	83088	77981	0.938535	41544	37424	90	83088	77981	41544	37027	89	83088	77981	41544	36088	86	1	4	3	11014_1#59	156486	146881	0.938621	78243	69552	88	156486	146881	78243	69625	88	156486	146881	78243	70706	90	0	2	2
PB-85 + PB-8	E10	60	10986_1#60	66844	62706	0.938095	33422	28259	84	66844	62706	33422	24188	72	66844	62706	33422	3246	9	12	75	63	11014_1#60	126550	124697	0.985358	63275	59546	94	126550	124697	63275	59456	93	126550	124697	63275	59042	93	1	1	0
PB-101 + PB-102	E11	61	10986_1#61	94874	92240	0.972237	47437	43576	91	94874	92240	47437	43400	91	94874	92240	47437	43203	91	0	0	0	11014_1#61	173412	171075	0.986523	86706	82281	94	173412	171075	86706	80974	93	173412	171075	86706	78002	89	1	5	4
Negative Control	E12	62	10986_1#62	17986	3420	0.190148	8993	163	1	17986	3420	8993	268	2	17986	3420	8993	275	3	1	2	1	11014_1#62	31918	2556	0.0800802	15959	6	0	31918	2556	15959	160	1	31918	2556	15959	154	0	1	0	1
unknown_MP6	F1	63	10986_1#63	142544	140308	0.984314	71272	67329	94	142544	140308	71272	67349	94	142544	140308	71272	67841	95	0	1	1	11014_1#63	196524	193848	0.986383	98262	92199	93	196524	193848	98262	92142	93	196524	193848	98262	92188	93	0	0	0
unknown_MP14	F2	64	10986_1#64	84374	82533	0.97818	42187	38349	90	84374	82533	42187	38329	90	84374	82533	42187	38263	90	0	0	0	11014_1#64	195276	190419	0.975128	97638	88212	90	195276	190419	97638	88054	90	195276	190419	97638	84520	86	0	4	4
PB-3 + PB-59 (1:100)	F3	65	10986_1#65	65446	64502	0.985576	32723	30755	93	65446	64502	32723	30760	94	65446	64502	32723	30736	93	1	0	1	11014_1#65	163854	161019	0.982698	81927	76814	93	163854	161019	81927	76708	93	163854	161019	81927	75837	92	0	1	1
PB-3 + PB-1 (1:100)	F4	66	10986_1#66	189994	188143	0.990258	94997	91432	96	189994	188143	94997	91617	96	189994	188143	94997	91669	96	0	0	0	11014_1#66	235954	232737	0.986366	117977	112272	95	235954	232737	117977	112430	95	235954	232737	117977	112224	95	0	0	0
Small pool growth -3cycles #2	F5	67	10986_1#67	78282	74057	0.946028	39141	35661	91	78282	74057	39141	35668	91	78282	74057	39141	35713	91	0	0	0	11014_1#67	152536	146810	0.962461	76268	71056	93	152536	146810	76268	70966	93	152536	146810	76268	70193	92	0	1	1
PB-12 + PB-13	F6	68	10986_1#68	75194	71629	0.952589	37597	32665	86	75194	71629	37597	33417	88	75194	71629	37597	31033	82	2	4	6	11014_1#68	180036	175962	0.977371	90018	80996	89	180036	175962	90018	80799	89	180036	175962	90018	80778	89	0	0	0
PB-31 + PB-34	F7	69	10986_1#69	77854	77208	0.991702	38927	37840	97	77854	77208	38927	37842	97	77854	77208	38927	37902	97	0	0	0	11014_1#69	146704	144796	0.986994	73352	70986	96	146704	144796	73352	69527	94	146704	144796	73352	66516	90	2	6	4
PB-53 + PB-54	F8	70	10986_1#70	76154	74470	0.977887	38077	34804	91	76154	74470	38077	34974	91	76154	74470	38077	35024	91	0	0	0	11014_1#70	113796	111654	0.981177	56898	52323	91	113796	111654	56898	53102	93	113796	111654	56898	53070	93	2	2	0
PB-71 + PB-72	F9	71	10986_1#71	91288	89450	0.979866	45644	41082	90	91288	89450	45644	40936	89	91288	89450	45644	40692	89	1	1	0	11014_1#71	159928	157374	0.98403	79964	71691	89	159928	157374	79964	72008	90	159928	157374	79964	71725	89	1	0	1
PB-87 + PB-115	F10	72	10986_1#72	200304	196961	0.98331	100152	90545	90	200304	196961	100152	89767	89	200304	196961	100152	89581	89	1	1	0	11014_1#72	166520	160958	0.966599	83260	69530	83	166520	160958	83260	69297	83	166520	160958	83260	68721	82	0	1	1
PB-103+ PB-104	F11	73	10986_1#73	67350	66370	0.985449	33675	31289	92	67350	66370	33675	31247	92	67350	66370	33675	31210	92	0	0	0	11014_1#73	160100	156856	0.979738	80050	73712	92	160100	156856	80050	73676	92	160100	156856	80050	72900	91	0	1	1
Negative Control	F12	74	10986_1#74	1156	132	0.114187	578	7	1	1156	132	578	7	1	1156	132	578	7	1	0	0	0	11014_1#74	1352	271	0.200444	676	42	6	1352	271	676	42	6	1352	271	676	41	6	0	0	0
unknown_MP7	G1	75	10986_1#75	64808	61172	0.943896	32404	27561	85	64808	61172	32404	28062	86	64808	61172	32404	28408	87	1	2	1	11014_1#75	146152	143115	0.97922	73076	67652	92	146152	143115	73076	67934	92	146152	143115	73076	66628	91	0	1	1
unknown_MP15	G2	76	10986_1#76	86252	80888	0.93781	43126	37158	86	86252	80888	43126	37025	85	86252	80888	43126	37616	87	1	1	2	11014_1#76	152574	147477	0.966593	76287	71016	93	152574	147477	76287	70732	92	152574	147477	76287	69584	91	1	2	1
PB-3 + PB-69 (1:100)	G3	77	10986_1#77	91194	38240	0.419326	45597	16146	35	91194	38240	45597	16258	35	91194	38240	45597	16646	36	0	1	1	11014_1#77	136490	86411	0.633094	68245	39676	58	136490	86411	68245	39544	57	136490	86411	68245	39303	57	1	1	0
PB-3 + PB-106 (1:1,000)	G4	78	10986_1#78	84496	82860	0.980638	42248	39163	92	84496	82860	42248	39241	92	84496	82860	42248	39738	94	0	2	2	11014_1#78	82596	79798	0.966124	41298	36726	88	82596	79798	41298	36878	89	82596	79798	41298	37252	90	1	2	1
Small pool growth -3 cycles #3	G5	79	10986_1#79	83426	78858	0.945245	41713	38323	91	83426	78858	41713	38330	91	83426	78858	41713	38252	91	0	0	0	11014_1#79	164612	158694	0.964049	82306	77210	93	164612	158694	82306	77074	93	164612	158694	82306	75992	92	0	1	1
PB-16 + PB-17	G6	80	10986_1#80	57864	56670	0.979365	28932	27406	94	57864	56670	28932	27473	94	57864	56670	28932	27306	94	0	0	0	11014_1#80	155108	153316	0.988447	77554	75588	97	155108	153316	77554	75652	97	155108	153316	77554	75889	97	0	0	0
PB-35 +PB-36	G7	81	10986_1#81	73992	67515	0.912464	36996	28557	77	73992	67515	36996	29001	78	73992	67515	36996	27793	75	1	2	3	11014_1#81	158284	149870	0.946842	79142	64268	81	158284	149870	79142	64409	81	158284	149870	79142	65087	82	0	1	1
PB-55 + PB-56	G8	82	10986_1#82	78948	78219	0.990766	39474	37053	93	78948	78219	39474	37041	93	78948	78219	39474	36991	93	0	0	0	11014_1#82	192298	189601	0.985975	96149	89935	93	192298	189601	96149	89652	93	192298	189601	96149	88950	92	0	1	1
PB-73 + PB-74	G9	83	10986_1#83	91620	45871	0.500666	45810	20707	45	91620	45871	45810	20924	45	91620	45871	45810	21175	46	0	1	1	11014_1#83	171042	58428	0.3416	85521	24912	29	171042	58428	85521	25223	29	171042	58428	85521	25335	29	0	0	0
PB-89 + PB-90	G10	84	10986_1#84	92404	90783	0.982457	46202	40810	88	92404	90783	46202	40777	88	92404	90783	46202	40963	88	0	0	0	11014_1#84	173870	169445	0.97455	86935	74969	86	173870	169445	86935	74974	86	173870	169445	86935	74764	85	0	1	1
PB-105 + PB-16	G11	85	10986_1#85	80896	79618	0.984202	40448	38388	94	80896	79618	40448	38409	94	80896	79618	40448	38578	95	0	1	1	11014_1#85	195284	191534	0.980797	97642	92514	94	195284	191534	97642	92497	94	195284	191534	97642	92409	94	0	0	0
Small pool growth -15 cycles #1	G12	86	10986_1#86	116894	112713	0.964233	58447	53301	91	116894	112713	58447	53345	91	116894	112713	58447	54047	92	0	1	1	11014_1#86	207854	202340	0.973472	103927	95722	92	207854	202340	103927	95823	92	207854	202340	103927	96043	92	0	0	0
unknown_MP8	H1	88	10986_1#88	64222	62773	0.977438	32111	29400	91	64222	62773	32111	29509	91	64222	62773	32111	29878	93	0	2	2	11014_1#88	141876	139577	0.983796	70938	66035	93	141876	139577	70938	65839	92	141876	139577	70938	65586	92	1	1	0
unknown_MP16	H2	91	10986_1#91	91628	84140	0.918278	45814	32769	71	91628	84140	45814	35846	78	91628	84140	45814	36543	79	7	8	1	11014_1#91	145926	137456	0.941957	72963	61846	84	145926	137456	72963	62515	85	145926	137456	72963	62481	85	1	1	0
PB-3 + PB-116 (1:100)	H3	92	10986_1#92	77178	75936	0.983907	38589	36590	94	77178	75936	38589	36515	94	77178	75936	38589	36811	95	0	1	1	11014_1#92	146108	144544	0.989296	73054	68719	94	146108	144544	73054	68516	93	146108	144544	73054	67685	92	1	2	1
PB-3 + PB-10 (1:1,000)	H4	93	10986_1#93	30960	30171	0.974516	15480	11917	76	30960	30171	15480	11891	76	30960	30171	15480	11852	76	0	0	0	11014_1#93	172854	170839	0.988343	86427	81541	94	172854	170839	86427	81296	94	172854	170839	86427	80765	93	0	1	1
Small pool growth -6 cycles #1	H5	94	10986_1#94	84222	80893	0.960474	42111	38262	90	84222	80893	42111	38240	90	84222	80893	42111	38230	90	0	0	0	11014_1#94	164244	158811	0.966921	82122	75350	91	164244	158811	82122	75350	91	164244	158811	82122	74874	91	0	0	0
PB-18 + PB-114	H6	95	10986_1#95	27110	26241	0.967945	13555	12480	92	27110	26241	13555	12556	92	27110	26241	13555	12689	93	0	1	1	11014_1#95	73858	70836	0.959084	36929	32190	87	73858	70836	36929	33241	90	73858	70836	36929	29287	79	3	8	11
PB-37 + PB-14	H7	96	10986_1#96	90240	87468	0.969282	45120	41994	93	90240	87468	45120	42031	93	90240	87468	45120	42912	95	0	2	2	11014_1#96	184664	182181	0.986554	92332	87277	94	184664	182181	92332	87493	94	184664	182181	92332	87132	94	0	0	0
PB-57 + PB-58	H8	97	10986_1#97	69628	66393	0.953539	34814	31083	89	69628	66393	34814	31160	89	69628	66393	34814	32324	92	0	3	3	11014_1#97	182954	168525	0.921133	91477	60160	65	182954	168525	91477	60178	65	182954	168525	91477	63100	68	0	3	3
PB-75 + PB-76	H9	98	10986_1#98	79652	77800	0.976749	39826	37517	94	79652	77800	39826	38354	96	79652	77800	39826	38538	96	2	2	0	11014_1#98	152634	146092	0.957139	76317	71654	93	152634	146092	76317	71814	94	152634	146092	76317	71665	93	1	0	1
PB-91 + PB-92	H10	99	10986_1#99	87456	83188	0.951198	43728	40112	91	87456	83188	43728	39449	90	87456	83188	43728	37601	85	1	6	5	11014_1#99	162420	149546	0.920736	81210	68699	84	162420	149546	81210	65995	81	162420	149546	81210	56035	69	3	15	12
PB-107 + PB-108	H11	100	10986_1#100	88592	83752	0.945368	44296	38745	87	88592	83752	44296	37849	85	88592	83752	44296	37487	84	2	3	1	11014_1#100	169164	166670	0.985257	84582	79909	94	169164	166670	84582	79817	94	169164	166670	84582	79811	94	0	0	0
Small pool growth -15cycles #2	H12	101	10986_1#101	112984	109142	0.965995	56492	51619	91	112984	109142	56492	51667	91	112984	109142	56492	52317	92	0	1	1	11014_1#101	237488	232015	0.976955	118744	109765	92	237488	232015	118744	109890	92	237488	232015	118744	110053	92	0	0	0
