# Supplementary material for: Quantitative insertion-site sequencing (QIseq) for high throughput phenotyping of transposon mutants
Source: HighWire-hosted journal article supplement (doi:10.1101/gr.200279.115), 2016-05-10
Supplement: Supplemental_Table_S3.xlsx [file Supplemental_Table_S3.xlsx]

## Sheet: Table S3_unknown MPs
Supplemental Table S3: QIseq identification of insertion sites in uncloned P. falciparum pools.
19 transfected MPs (mixed populations) randomly selected and QIseq identified 254 piggyBac insertion sites across all fourteen chromosomes,
parasites input vary in each MP 31,000, 62,000, 124,000 and 248,000, parasite input based on the number of transfected plate.
More than 450 transfected MPs have been generated in a single round of transfection - ten 96-well microwell plates.
			Insertion site 1			Insertion site 2			Insertion site 3			Insertion site 4			Insertion site 5			Insertion site 6			Insertion site 7			Insertion site 8			Insertion site 9			Insertion site 10			Insertion site 11			Insertion site 12			Insertion site 13			Insertion site 14			Insertion site 15			Insertion site 16
Sample	Parasite Input	# insertion sites per MP	Chromosom::Position	5'	3'	Chromosom::Position	5'	3'	Chromosom::Position	5'	3'	Chromosom::Position	5'	3'	Chromosom::Position	5'	3'	Chromosom::Position	5'	3'	Chromosom::Position	5'	3'	Chromosom::Position	5'	3'	Chromosom::Position	5'	3'	Chromosom::Position	5'	3'	Chromosom::Position	5'	3'	Chromosom::Position	5'	3'	Chromosom::Position	5'	3'	Chromosom::Position	5'	3'	Chromosom::Position	5'	3'	Chromosom::Position	5'
MP1	31000	6	PfNF54_14::2311384	99609.7	91101.2	PfNF54_01::181446	127.12	397.14	PfNF54_13::1166770	110.74	350.75	PfNF54_10::614466	81.99	273.08	PfNF54_13::1085631	27.61	7756.32	PfNF54_05::484048	9.24	10.23
MP2	31000	4	PfNF54_08::1232372	65581.2	43790.6	PfNF54_12::1622130	11355.3	3898.86	PfNF54_02::653826	16126.5	5875.19	PfNF54_11::1515705	6377.36	46270.5
MP3	31000	3	PfNF54_02::578295	98347.4	96372.3	PfNF54_13::907524	1131.03	2786.62	PfNF54_11::1128186	20.63	201.12
MP4	31000	5	PfNF54_12::1613083	98389.1	90082.1	PfNF54_14::1617496	661.24	1091.91	PfNF54_13::430618	367.79	8542.65	PfNF54_13::2352663	91.21	13.59	PfNF54_11::921073	5.69	7.49
MP5	31000	7	PfNF54_04::797867	88640.8	83168.8	PfNF54_05::1250257	7536.75	11714.2	PfNF54_04::824120	3430.32	4440.38	PfNF54_14::782538	98.73	391.54	PfNF54_11::1265916	15.88	0.54	PfNF54_05::1270527	4.2	6.61	PfNF54_12::1317943	3.79	5.4
MP6	62000	8	PfNF54_09::160917	96771.6	96773.6	PfNF54_12::1532350	2056.04	1039.82	PfNF54_10::1378570	403.12	1392.66	PfNF54_12::238987	134.65	136.73	PfNF54_03::1028098	49.39	229.92	PfNF54_10::1126985	15.96	8.71	PfNF54_13::496613	8.84	274.7	PfNF54_14::2745858	5.23	23.99
MP7	62000	9	PfNF54_07::1052293	90299.8	99457	PfNF54_01::186305	7459.46	223.39	PfNF54_03::462475	795.15	9.16	PfNF54_11::1984379	170.3	55.23	PfNF54_11::1236753	316.77	36.26	PfNF54_14::205808	56.63	5.52	PfNF54_13::2843078	34.81	4.65	PfNF54_08::1374031	22.49	5.91	PfNF54_08::1373949	12.59	2.82
MP8	62000	10	PfNF54_12::1314074	88146.2	95227.8	PfNF54_13::2785991	5948.04	3540.93	PfNF54_13::2671236	3075.06	127.42	PfNF54_12::2158219	1468.49	419.98	PfNF54_12::2153388	785.96	260.84	PfNF54_13::87960	179.32	13.35	PfNF54_13::2842346	118.04	137.29	PfNF54_06::172862	88.96	26.75	PfNF54_12::2170738	61.37	198.18	PfNF54_06::275128	11.21	2.55
MP9	62000	25	PfNF54_07::102383	86848.6	16779.6	PfNF54_07::1002897	5072.05	5891.72	PfNF54_02::854264	3980.8	6107.9	PfNF54_09::132402	1469.54	3940.09	PfNF54_10::1358302	930.15	2043.76	PfNF54_14::1271102	273.4	399.86	PfNF54_13::2128146	495.97	11039.2	PfNF54_07::818495	39.23	86.91	PfNF54_11::1144588	32.14	185.98	PfNF54_06::1038363	23.29	11.24	PfNF54_14::802128	22.56	29.64	PfNF54_10::158061	18.04	17.97	PfNF54_09::503178	18.04	28.65	PfNF54_07::1032072	15.41	19.67	PfNF54_10::261722	12.66	6.97	PfNF54_14::1680565	9.51
MP10	62000	60	PfNF54_14::2454161	41510.4	54491.4	PfNF54_08::1229493	32566.7	1407.96	PfNF54_09::901745	8914.17	1593.33	PfNF54_06::186830	5218.36	8572.91	PfNF54_14::1862681	4081.96	21468.8	PfNF54_13::81857	3998.27	8870.41	PfNF54_14::1791659	1446.08	423.29	PfNF54_10::785254	1299.22	627.79	PfNF54_13::1975394	110.86	166.2	PfNF54_06::706439	57.93	0.89	PfNF54_03::169381	36.2	15.27	PfNF54_14::2696535	32.32	71.25	PfNF54_13::2507520	31.5	34.69	PfNF54_09::436823	30.11	4.92	PfNF54_14::843695	26.37	41.86	PfNF54_08::1374094	21.94
MP11	124000	11	PfNF54_11::1804903	64168.2	63466.6	PfNF54_05::834902	29978.7	25322.4	PfNF54_07::1046611	3262.28	5021.72	PfNF54_11::1569479	1134.48	2747.48	PfNF54_07::925122	441.94	416.45	PfNF54_11::387429	213.64	13.71	PfNF54_04::714013	135.9	374.01	PfNF54_03::793620	135.13	1098.18	PfNF54_03::676597	65.55	244.24	PfNF54_07::1156567	37.6	36.01	PfNF54_12::1147851	6.18	13.03
MP12	124000	10	PfNF54_13::2274744	27862.9	68275	PfNF54_08::129025	3331.85	11211.4	PfNF54_07::401001	535.25	479.77	PfNF54_13::1040443	425.82	8331.36	PfNF54_12::835769	54.24	2643.23	PfNF54_01::425556	15.25	56.93	PfNF54_08::1373949	19.35	40.09	PfNF54_12::163881	9.33	11.37	PfNF54_09::478177	6.39	49.83	PfNF54_11::1422430	2.17	303.29
MP13	124000	8	PfNF54_08::468200	95249.8	97463.6	PfNF54_08::321070	2721.06	1872.65	PfNF54_09::1059386	1631.6	114.23	PfNF54_08::471272	37.09	35.6	PfNF54_14::3059975	27.94	23.02	PfNF54_06::588025	15.76	21.6	PfNF54_14::3116269	15	83.9	PfNF54_11::139459	0.97	4.35
MP14	124000	8	PfNF54_14::1769523	41366.3	44116.6	PfNF54_10::1452070	34573.2	45725.4	PfNF54_07::1348122	10681.7	3183.1	PfNF54_14::1532895	4182.48	5593.3	PfNF54_09::1062740	3255.72	11.59	PfNF54_07::1318289	775.73	669.64	PfNF54_14::577108	46.09	24.77	PfNF54_14::2988634	0.57	133.02
MP15	124000	17	PfNF54_11::1199997	62157.4	92468.1	PfNF54_13::342999	26123.8	690.57	PfNF54_14::3122076	8439.52	4881.68	PfNF54_14::987963	1324.77	364.97	PfNF54_09::1166595	296.52	609.17	PfNF54_14::1874829	220.15	1.96	PfNF54_11::1200189	182.8	7.17	PfNF54_06::453446	153.1	157.05	PfNF54_10::850750	18.68	14.76	PfNF54_11::1993893	16.32	1.63	PfNF54_11::195837	15.73	2.28	PfNF54_12::1280863	22.26	11.54	PfNF54_13::2843094	11.18	3.71	PfNF54_05::1300141	6.85	3.79	PfNF54_14::812612	1.44	5.67	PfNF54_07::1237315	1.5
MP16	248000	33	PfNF54_12::1093080	34617	47863.1	PfNF54_14::68407	3093.32	258.8	PfNF54_12::165543	1131.96	1955.88	PfNF54_09::394035	650.87	1395.76	PfNF54_14::2724581	626.37	1317.32	PfNF54_01::72602	393.8	26378.4	PfNF54_08::1374031	294.7	493.73	PfNF54_03::801761	205.94	155.32	PfNF54_07::522525	180.78	354.52	PfNF54_03::643430	168.76	107.75	PfNF54_14::236840	130.78	205.61	PfNF54_12::1369978	127.52	245.02	PfNF54_14::3102586	67.75	118.04	PfNF54_10::979149	62.36	61.16	PfNF54_08::710746	85.05	536.64	PfNF54_03::193413	56.85
MP17	248000	10	PfNF54_10::1449333	43307.4	98019.3	PfNF54_10::1497930	9224.15	910.88	PfNF54_08::564851	1755.37	473.11	PfNF54_12::1064071	105.43	33.39	PfNF54_04::1180500	76.48	2.19	PfNF54_14::1794503	31.28	18.47	PfNF54_09::550274	15.72	7.4	PfNF54_09::712490	24.01	7.19	PfNF54_09::70565	9.29	6.54	PfNF54_13::1969054	3.5	5.14
MP18	248000	8	PfNF54_07::134421	66615.2	10703.3	PfNF54_10::963058	30565.9	9058.31	PfNF54_11::1031934	1310.16	76732.7	PfNF54_13::77167	604.08	1149.84	PfNF54_12::162188	306.29	88.31	PfNF54_13::2843147	15.45	21.38	PfNF54_10::741714	8.92	46.06	PfNF54_13::2841764	2.01	24.67
MP19	248000	12	PfNF54_13::2705767	60512.6	22606.2	PfNF54_11::1915032	16754.1	31105	PfNF54_10::1558597	11955.6	22086	PfNF54_07::798738	7381.91	14906.8	PfNF54_02::530832	1062.57	1522.05	PfNF54_08::497887	1056.01	2894.72	PfNF54_08::1374031	152.91	113.8	PfNF54_13::657735	54.29	2958.03	PfNF54_07::1156179	53.52	24.3	PfNF54_12::1830218	14.53	30.2	PfNF54_05::955827	7.58	6.22	PfNF54_11::1865939	4.86	20.87
		SUM 254
[truncated: 133 more columns]
