# Supplementary material for: Quantitative insertion-site sequencing (QIseq) for high throughput phenotyping of transposon mutants
Source: HighWire-hosted journal article supplement (doi:10.1101/gr.200279.115), 2016-05-10
Supplement: Supplemental_Table_S4.xlsx [file Supplemental_Table_S4.xlsx]

## Sheet: Table S4_Small pool growth
Supplemental Table S4. QIseq parallel phenotyping of P. falciparum clones in a small mixed pool (n=41).
Over 24 growth cycles, top quartile and bottom quartile highlighted in bold (n=10).
		Reads Number								Fold Change
Insertion site	Gene_ID_13.0	3Cycle	6Cycle	9Cycle	12Cycle	15Cycle	18Cycle	21Cycle	24Cycle	3C/0C	6C/0C	9C/6C	12C/9C
PfNF54_13_m1::271629	PF3D7_1305500	5298.44	8132.48	13840.7	19374.5	35941	44941.5	61455.5	73697.9	2.1725	3.33456	1.70193	1.39982
PfNF54_07_m1::1090517	PF3D7_0726000	3802.34	3639.73	5090.93	6746.05	4724.33	4569.54	3051.27	1497.3	1.55906	1.4924	1.39873	1.32512
PfNF54_12_m1::769606	PF3D7_1219300	8829.13	9561.94	13204.4	16583.5	12025.2	9954.43	6989.01	3153.3	3.62017	3.92068	1.38095	1.25591
PfNF54_04_m1::34709	PF3D7_0400100	815.65	956.57	1241.9	1559.47	1605.39	1717.34	1832.07	2547.02	0.334437	0.392222	1.2983	1.25572
PfNF54_12_m1::356310	PF3D7_1207800	7116.15	6205.95	8378.26	10485.9	7841.19	7752.27	5385.32	2544.97	2.9178	2.54462	1.35005	1.25157
PfNF54_12_m1::1319997	PF3D7_1231800	5331.35	5321.64	6518.48	7664.16	4599.23	3925.18	2382.84	924.42	2.18599	2.18203	1.22491	1.17576
PfNF54_06_m1::667365	PF3D7_0615900	1779.29	2292.83	2652.26	2952.1	2881.33	3074.2	2475.66	2108.17	0.729554	0.940128	1.15678	1.11305
PfNF54_11_m1::879695	PF3D7_1122900	5606.98	3825.77	3590.4	3565.65	3369.56	3145.45	1882.21	1719.6	2.29901	1.56868	0.938488	0.993109
PfNF54_14_m1::1281184	PF3D7_1432400	4433.12	2337.84	2336.22	2172.64	1162.38	827.78	412.82	97.19	1.81769	0.958584	0.999318	0.929984
PfNF54_05_m1::889784	PF3D7_0521900	4055.1	3168.95	2952.49	2581.43	2153.49	1669.97	899.44	493.64	1.66269	1.29936	0.931704	0.874326
PfNF54_14_m1::3116484	PF3D7_1475600	701.22	904.28	683.72	589.37	374.16	299.61	139.69	61.92	0.287518	0.370782	0.756102	0.862007
PfNF54_12_m1::1137689	PF3D7_1227800	752.68	1406.15	712.98	605.76	935.4	806.75	539.29	223.06	0.308618	0.576563	0.50705	0.84962
PfNF54_05_m1::1296386	PF3D7_0532100	26.4	34.45	57.53	47.95	69.37	79.91	110.16	152.2	0.0108247	0.0141255	1.66997	0.833481
PfNF54_06_m1::841186	PF3D7_0619900	5288.41	5701.77	8298.67	6868.28	8013.83	7180.66	7203.55	8708.06	2.16838	2.3379	1.45547	0.827639
PfNF54_09_m1::99320	PF3D7_0902200	833.39	514.3	335.17	254.84	136.38	81.33	40.53	15.54	0.341711	0.210878	0.651709	0.760333
PfNF54_04_m1::250802	PF3D7_0404600	3675.77	3077.14	2689.19	2041.41	1673.32	1279.69	746.14	597.39	1.50716	1.26172	0.873935	0.759119
PfNF54_08_m1::446344	PF3D7_0808700	2905.43	4751.02	2768.3	2095.41	2376.98	1943.84	998.73	221.83	1.1913	1.94806	0.582681	0.756932
PfNF54_11_m1::1544148	PF3D7_1138900	63.98	71.75	44.01	32.89	15.88	12.86	6.03	2.56	0.0262334	0.0294196	0.613387	0.747332
PfNF54_10_m1::1422622	PF3D7_1035800	1332.22	1366.69	1236.81	921.57	612.29	476.32	289.01	186.17	0.546244	0.560384	0.904977	0.745121
PfNF54_14_m1::1812894	PF3D7_1444100	3147.69	1763.71	976.26	706.43	410.76	369.44	223.65	106.01	1.29063	0.723174	0.553532	0.723611
PfNF54_06_m1::498591	PF3D7_0611800	2269.06	2566.89	1974.36	1350.28	840.46	634.44	301.41	120.8	0.930373	1.0525	0.769173	0.68391
PfNF54_08_m1::568855	PF3D7_0811300	1823.56	1883.43	916.1	610.73	493.82	322.46	165.36	33.44	0.747706	0.772262	0.486405	0.666665
PfNF54_10_m1::216125	PF3D7_1004600	3047.87	2340.66	1877.47	1113.61	719.81	454.56	232.54	110.69	1.2497	0.95974	0.80212	0.593146
PfNF54_04_m1::724234	PF3D7_0416500	267.25	839.88	321.57	186.36	213	77.3	61.97	17.04	0.109579	0.344376	0.38288	0.579533
PfNF54_09_m1::1250793	PF3D7_0931000	4562.06	4406.84	3492.35	2013.98	1030.72	599.86	298.73	107.14	1.87056	1.80694	0.792493	0.576685
PfNF54_06_m1::933481	PF3D7_0622900	1068.82	1098.3	426.25	243.06	170.37	118.83	55.64	20.64	0.438244	0.450336	0.388104	0.57023
PfNF54_10_m1::733690	PF3D7_1018400	2326.4	4510.57	2732.65	1543.6	1376.52	1065.22	492.46	152.5	0.953883	1.84947	0.605839	0.564875
PfNF54_05_m1::516248	PF3D7_0511500	2039.29	1104.83	691.46	387.16	232.7	142.41	67.4	29.88	0.836161	0.453013	0.625859	0.559918
PfNF54_11_m1::1676856	PF3D7_1141900	3195.14	2340.34	2065.43	1143.66	564.48	361.38	186.16	90.25	1.31009	0.959609	0.882544	0.553717
PfNF54_06_m1::1119286	PF3D7_0627900	459.52	1073.81	765.48	421.66	492.41	463.43	252.12	73.98	0.188415	0.440294	0.712871	0.550846
PfNF54_11_m1::1302725	PF3D7_1133700	204.16	152.83	52.78	28.2	16.2	7.52	4.44	0	0.0837108	0.0626648	0.345355	0.534295
PfNF54_13_m1::1833303	PF3D7_1345800	2137.11	2476.01	2008.21	1026.1	688.9	390.45	156.66	24.75	0.87627	1.01524	0.811076	0.510954
PfNF54_05_m1::965601	PF3D7_0523100	1241.24	2532.99	1530.07	779.78	699.06	409.6	188.5	60.27	0.50894	1.0386	0.604064	0.509638
PfNF54_11_m1::1739772	PF3D7_1143500	1728.21	1403.3	1193.93	564.12	1085.86	614.26	404.16	77.02	0.70861	0.575395	0.850811	0.472491
PfNF54_07_m1::1367266	PF3D7_0731600	656.65	560.58	195.1	82.36	63.38	45.84	14.72	1.74	0.269243	0.229854	0.348036	0.422144
PfNF54_02_m1::451759	PF3D7_0211100	2363.97	1788.07	688.77	233.7	144.31	63.69	21.95	0	0.969288	0.733162	0.385207	0.339301
PfNF54_11_m1::1404540	PF3D7_1136000	976.56	1138.95	412.34	134.78	75.34	35.46	10.71	0	0.400415	0.467003	0.362039	0.326867
PfNF54_14_m1::2436451	PF3D7_1459500	1623.21	728.76	309.84	89.84	32.69	14.82	1.9	0	0.665558	0.298813	0.425165	0.289957
PfNF54_02_m1::246992	PF3D7_0206100	717.49	668.75	302.76	84.77	51.54	28.03	7.92	0	0.294189	0.274207	0.45273	0.279992
PfNF54_08_m1::1318070	PF3D7_0830900	944.31	852.62	293.46	79.12	71.42	31.58	8.19	0	0.387191	0.3496	0.34419	0.269612
PfNF54_14_m1::450635	PF3D7_1411100.1	548.15	490.38	133.54	26.16	11.63	5.38	1	0	0.224756	0.20107	0.272322	0.195897
