# Supplementary material for: Quantitative insertion-site sequencing (QIseq) for high throughput phenotyping of transposon mutants
Source: HighWire-hosted journal article supplement (doi:10.1101/gr.200279.115), 2016-05-10
Supplement: Supplemental_Table_S5.xlsx [file Supplemental_Table_S5.xlsx]

## Sheet: Table S5_Large pool growth
Supplemental Table S5. QIseq parallel phenotyping of P. falciparum clones in a large mixed pool (n=128)
Over 24 growth cycles top quartile and bottom quartile highlighted in bold (n=32).
* Normalized Reads Counts are the averages of 2 biological replicates (top quartile and bottom quartile highlighted in bold)
		Normalized Reads Counts						Fold Change
Insertion Site	Gene_ID_13.0	3Cycle	9Cycle	12Cycle	18Cycle	21Cycle	24Cycle	3C/0 Cycle	12C/3 C ycle
PfNF54_05_m1::1296386	PF3D7_0532000	7.855	22.205	57.49	95.94	92.05	61.485	0.0104173	7.43626
PfNF54_12_m1::342678	PF3D7_1207300	831.215	2073.53	5479.11	7796.91	7472.02	4385.28	1.10236	6.69739
PfNF54_13_m1::271629	PF3D7_1305500	4038.19	9883.39	18568.6	49586.2	56292.6	69731.2	5.35546	4.67198
PfNF54_07_m1::215219	PF3D7_0704600	382.105	842.59	1374.85	1551.38	1279.65	1729.14	0.506749	3.65578
PfNF54_06_m1::841186	PF3D7_0619900	1711.66	2455.39	5554.93	4344.11	3220.51	1810.02	2.27001	3.29738
PfNF54_12_m1::356310	PF3D7_1207800	3541.3	7068.4	10584.3	7563.9	9293.08	5277.62	4.69648	3.03673
PfNF54_13_m1::1848524	PF3D7_1346300	137.4	274.625	392.365	404.585	298.155	139.51	0.18222	2.90143
PfNF54_09_m1::1507053	PF3D7_0937800	1187.2	2809.3	2817.87	1172.98	880.575	612.15	1.57447	2.41159
PfNF54_12_m1::46222	PF3D7_1200600	901.47	1649.5	2006.73	1368.4	910.155	753.175	1.19553	2.26176
PfNF54_04_m1::34709	PF3D7_0400100	478.67	803.38	963.63	711.565	960.645	999.895	0.634813	2.04542
PfNF54_10_m1::664393	PF3D7_1016500	423.24	670.905	843.525	627.74	464.72	443.11	0.561302	2.02498
PfNF54_09_m1::52076	PF3D7_0900800	201.395	370.68	394.33	308.01	211.885	157.175	0.267091	1.98939
PfNF54_12_m1::769606	PF3D7_1219300	5168.01	7778.62	10098	5730.96	4636.84	3644.41	6.85382	1.98527
PfNF54_13_m1::59525	PF3D7_1300800	208.635	367.05	392.975	316.16	221.395	154.66	0.276692	1.91375
PfNF54_02_m1::35355	PF3D7_0200300	138.255	246.945	255.805	191.22	158.035	111.37	0.183354	1.87991
PfNF54_07_m1::1090517	PF3D7_0726000	2143.57	3279.03	3834.16	2498.57	1955.67	1558.44	2.8428	1.81736
PfNF54_06_m1::667365	PF3D7_0615900	969.85	1296.83	1609.44	1533.53	1730.5	1422.63	1.28622	1.68608
PfNF54_10_m1::71373	PF3D7_1001200	139.115	223.15	217.11	143	106.92	106.275	0.184495	1.58568
PfNF54_13_m1::2095448	PF3D7_1352600	139.685	168.47	193.675	52.22	49.415	10.83	0.185251	1.40874
PfNF54_11_m1::141915	PF3D7_1103100	707.215	1011.22	957.025	570.83	347.49	302.98	0.937911	1.37493
PfNF54_12_m1::1319997	PF3D7_1231800	3501.47	3681.64	4350.33	1772.61	1291.76	943.61	4.64365	1.26235
PfNF54_05_m1::1012936	PF3D7_0524400	422.705	413.72	523.315	158.1	132.065	26.165	0.560593	1.25787
PfNF54_06_m1::530075	PF3D7_0612800	183.135	164.755	213.875	60.855	45.285	10.77	0.242874	1.18658
PfNF54_11_m1::1544148	PF3D7_1138900	14.06	10.73	15.975	6.51	6.435	3.85	0.0186464	1.15442
PfNF54_11_m1::879695	PF3D7_1122900	2480.45	2266.3	2363.94	2112.03	1046.29	759.075	3.28957	0.968312
PfNF54_13_m1::1891837	PF3D7_1347200	399.41	379.045	350.355	221.37	147.155	100.01	0.529699	0.891247
PfNF54_13_m1::1758853	PF3D7_1344000	390.955	405.215	317.08	150.595	94.74	52.915	0.518486	0.824044
PfNF54_14_m1::3116484	PF3D7_1475700	412.965	345.315	330.31	143.03	92.98	62.585	0.547675	0.812675
PfNF54_09_m1::699679	PF3D7_0916700	26.235	16.6	20.365	28.405	30.675	36.14	0.0347929	0.7887
PfNF54_09_m1::698767	PF3D7_0916700	122.27	147.865	93.4	51.49	36.42	18.975	0.162155	0.776132
PfNF54_11_m1::1855678	PF3D7_1146900	354.29	318.395	263.215	86.035	62.47	25.785	0.46986	0.754849
PfNF54_06_m1::1119286	PF3D7_0627900	518.145	329.58	376.325	163	150.67	50.11	0.687165	0.737939
PfNF54_07_m1::1156274	PF3D7_0727200	432.105	362.425	294.915	81.445	63.58	22.265	0.573059	0.693452
PfNF54_04_m1::250802	PF3D7_0404600	2200.67	1664.62	1498.74	673.675	437.76	209.03	2.91853	0.691958
PfNF54_09_m1::99320	PF3D7_0902200	409.445	241.22	264.835	64.02	43.795	29.54	0.543007	0.657186
PfNF54_14_m1::1812894	PF3D7_1444100	2697.66	1828.33	1723.96	398.93	243.735	98.695	3.57764	0.649306
PfNF54_08_m1::446344	PF3D7_0808700	1552.9	1020.8	941.57	348.565	243.275	65.31	2.05946	0.616052
PfNF54_13_m1::510072	PF3D7_1311900	2154.59	1463.37	1242.79	764.85	419.69	226.055	2.85743	0.586058
PfNF54_09_m1::753068	PF3D7_0918300	351.45	361.36	198.835	99.13	57.15	31	0.466094	0.574828
PfNF54_02_m1::168158	PF3D7_0203600	567.94	362.325	315.115	127.16	93.385	40.485	0.753204	0.563735
PfNF54_13_m1::2736986	PF3D7_1368800	329.105	230.125	166.585	116.43	55.665	33.305	0.43646	0.514292
PfNF54_09_m1::831572	PF3D7_0920300	21.035	13.815	10.565	1.515	0	0	0.0278967	0.510312
PfNF54_04_m1::724234	PF3D7_0416500	44.775	33.76	22.36	5.025	3.725	0	0.0593807	0.507393
PfNF54_14_m1::373820	PF3D7_1409500	691.805	393.37	325.045	184.675	73.06	44.285	0.917474	0.477385
PfNF54_06_m1::498591	PF3D7_0611800	1506.73	794.265	701.595	268.445	158.915	87.585	1.99824	0.473106
PfNF54_10_m1::1422622	PF3D7_1035800	1958.04	1243.97	809.82	299.195	185.57	106.72	2.59675	0.42022
PfNF54_05_m1::889784	PF3D7_0521900	1188.59	931.525	478.64	204.975	133.435	73.475	1.5763	0.409154
PfNF54_11_m1::1532518	PF3D7_1138800	281.16	182.865	112.925	18.37	9.48	5.04	0.372875	0.40808
PfNF54_12_m1::845511	PF3D7_1221000	422.15	226.2	167.905	48.555	36.135	9.045	0.559857	0.404115
PfNF54_11_m1::351780	PF3D7_1108000	106.8	73.535	41.935	16.455	13.02	5.965	0.141638	0.398946
PfNF54_04_m1::659953	PF3D7_0414600	420.05	343.795	161.295	49.46	20.26	9.13	0.557071	0.390147
PfNF54_11_m1::1567137	PF3D7_1139300	282.565	201.08	108.05	44.085	31.555	22.08	0.374738	0.388521
PfNF54_14_m1::1370157	PF3D7_1434200	20.995	15.64	8.015	4.26	6.805	2.775	0.0278436	0.387879
PfNF54_01_m1::146981	PF3D7_0103300	311.23	192.295	118.665	61.59	48.75	29.385	0.412754	0.387391
PfNF54_01_m1::395817	PF3D7_0110500	397.305	243.09	151.05	44.08	37.995	12.355	0.526907	0.386283
PfNF54_05_m1::516248	PF3D7_0511500	918.195	405.165	347.235	65.47	38.64	18.215	1.21771	0.384235
PfNF54_09_m1::1250793	PF3D7_0931000	4594.35	2439.88	1680.81	290.915	156.185	57.985	6.09305	0.371709
PfNF54_13_m1::115505	PF3D7_1302000	334.655	276.95	117.67	0	0	0	0.44382	0.357254
PfNF54_14_m1::1281184	PF3D7_1432400	1364.42	555.815	478.07	131.745	90.495	55.34	1.8095	0.356
PfNF54_10_m1::92206	PF3D7_1001700	156.515	93.835	54.63	17.345	9.495	5.17	0.207571	0.354637
PfNF54_06_m1::77404	PF3D7_0601900	476.495	267.16	165.73	65.9	45.445	22.61	0.631929	0.353388
PfNF54_13_m1::1412492	PF3D7_1334800	220.72	143.17	76.725	26.785	12.755	6.175	0.292719	0.353186
PfNF54_12_m1::1092023	PF3D7_1227000	624.64	297.885	207.24	67.47	52.76	16.985	0.828399	0.337095
PfNF54_02_m1::109046	PF3D7_0202100	365.575	213.96	121.175	34.62	25.185	8.045	0.484827	0.336779
PfNF54_10_m1::216125	PF3D7_1004600	1803.19	1023.96	583.41	169.11	76.65	40.225	2.3914	0.328731
PfNF54_11_m1::1676856	PF3D7_1141900	2283.2	1044.54	684.205	137.335	68.62	27.95	3.02799	0.304474
PfNF54_08_m1::710781	PF3D7_0815000	321.685	183.28	95.78	13.84	5.92	2.58	0.42662	0.302519
PfNF54_06_m1::1257230	PF3D7_0630100	64.93	35.115	19.32	5.445	3.02	1.375	0.0861103	0.302322
PfNF54_06_m1::186830	PF3D7_0604400	843.48	406.645	248.225	40.88	21.09	6.17	1.11863	0.299006
PfNF54_13_m1::1833303	PF3D7_1345800	1825.1	830.86	520.135	83.665	39.61	15.25	2.42045	0.28956
PfNF54_13_m1::1138368	PF3D7_1327100	480	285.055	133.385	22.835	8.965	4.39	0.636577	0.282341
PfNF54_13_m1::1212674	PF3D7_1328700	640.145	374.97	174.505	65.205	48.57	19.325	0.848962	0.276973
PfNF54_14_m1::1277361	PF3D7_1432400	1201.17	603.3	320.065	51.465	21.61	10.445	1.59299	0.270734
PfNF54_14_m1::1339844	PF3D7_1433600	96.185	50.985	25.145	5.95	1.78	1.645	0.127561	0.265615
PfNF54_03_m1::930071	PF3D7_0322100	765.94	385.245	199.105	29.18	11.445	5.4	1.01579	0.264117
PfNF54_02_m1::170489	PF3D7_0203700	914.715	398.65	214.955	36.75	15.34	5.29	1.2131	0.238765
PfNF54_06_m1::933481	PF3D7_0622900	540.115	173.02	126.685	39.23	17.57	12.2	0.716302	0.238313
PfNF54_10_m1::100751	PF3D7_1001900	522.94	225.51	122.27	37.365	14.775	6.195	0.693524	0.237562
PfNF54_05_m1::965601	PF3D7_0523200	793.91	323.355	182.605	65.895	43.245	20.41	1.05289	0.233695
PfNF54_03_m1::297013	PF3D7_0306300	24.995	8.49	5.67	0	0	0	0.0331484	0.230483
PfNF54_06_m1::1373882	PF3D7_0632800	47.89	19.095	10.695	1.925	0.81	0.38	0.0635119	0.226905
PfNF54_14_m1::1855981	PF3D7_1445200	57.435	26.75	12.59	1.96	1.3	0	0.0761705	0.222719
PfNF54_10_m1::733690	PF3D7_1018300	1473.66	657.04	311.63	141.05	92.34	33.945	1.95438	0.214857
PfNF54_07_m1::1367266	PF3D7_0731600	348.235	94.395	73.255	19.22	16.13	4.695	0.46183	0.213734
PfNF54_08_m1::625232	PF3D7_0812500	114.12	43.805	23.81	4.365	2.92	0	0.151346	0.211985
PfNF54_14_m1::1027315	PF3D7_1426400	137.435	40.02	28.465	1.685	0	0	0.182267	0.210437
PfNF54_14_m1::1182677	PF3D7_1430000	395.78	171.525	81.38	13.225	7.29	1.875	0.524885	0.208916
PfNF54_14_m1::1359496	PF3D7_1433900	144.51	77.885	29.5	4.14	0	0	0.19165	0.207411
PfNF54_14_m1::1476670	PF3D7_1436200	418.49	220.635	81.33	12.56	4.665	0.92	0.555003	0.197458
PfNF54_12_m1::2131213	PF3D7_1252300	456.29	172.735	86.16	20.555	9.1	6.885	0.605133	0.191855
PfNF54_01_m1::186648	PF3D7_0104200	509.87	198.21	95.52	12.91	6.7	1.44	0.676191	0.190346
PfNF54_13_m1::2020022	PF3D7_1350500	695.02	298.665	129.095	17.85	7.31	1.875	0.921737	0.188721
PfNF54_10_m1::1417438	PF3D7_1035700	243.235	76.3	39.475	8.795	5.8	0	0.322579	0.164894
PfNF54_06_m1::979252	PF3D7_0623900	888.63	337.795	137.405	24.395	8.19	3.535	1.1785	0.157105
PfNF54_08_m1::568855	PF3D7_0811300	963.555	332.49	131.365	12.75	8.735	0.19	1.27787	0.13852
PfNF54_13_m1::1284702	PF3D7_1330500	258.53	55.565	34.09	16.485	8.205	2.875	0.342863	0.133975
PfNF54_11_m1::1302725	PF3D7_1133700	123.125	23.77	15.915	2.5	1.23	0.535	0.163289	0.131332
PfNF54_14_m1::249419	PF3D7_1406900	302.935	40.645	34.175	2.14	0.845	0	0.401753	0.114622
PfNF54_08_m1::389064	PF3D7_0807600	233.92	46.44	25.165	10.21	4.635	1.295	0.310225	0.109305
PfNF54_12_m1::648182	PF3D7_1216100	2052.95	6666.12	217.325	172.535	630.22	1185.84	2.72262	0.107558
PfNF54_13_m1::672107	PF3D7_1316000	861.595	239.04	86.305	8.68	1.405	0.575	1.14265	0.101775
PfNF54_02_m1::246992	PF3D7_0206100	580.975	109.455	48.95	5.835	2.535	0.61	0.770491	0.0856059
PfNF54_06_m1::607866	PF3D7_0614500	128.38	24.675	10.36	0.635	0	0	0.170258	0.0819919
PfNF54_14_m1::2436451	PF3D7_1459500	837.775	183.93	67.465	5.39	1.74	0.37	1.11106	0.08182
PfNF54_07_m1::252067	PF3D7_0705100	965.375	83.73	72.72	12.565	7.59	5.92	1.28028	0.0765361
PfNF54_02_m1::451759	PF3D7_0211100	1775.11	324.535	123.465	19.73	4.14	0.815	2.35415	0.0706689
PfNF54_07_m1::1336930	PF3D7_0731000	71.785	12.8	4.695	1.125	0.925	0	0.0952015	0.0664524
PfNF54_13_m1::2406699	PF3D7_1360200	871.46	2260.88	50.58	39.345	115.62	176.5	1.15573	0.0589712
PfNF54_11_m1::1445642	PF3D7_1136600	270.395	56.97	15.645	0.6	0	0	0.358599	0.0587876
PfNF54_02_m1::142289	PF3D7_0203000	388.08	75.32	22.06	3.885	2.88	0.435	0.514673	0.0577554
PfNF54_11_m1::1404540	PF3D7_1136000	1152.34	185.795	64.485	7.875	4.345	0.78	1.52823	0.0568576
PfNF54_04_m1::290343	PF3D7_0405400	60.115	9.79	3.17	0	0	0	0.0797247	0.0535778
PfNF54_11_m1::686002	PF3D7_1118100	100.025	14.275	5.22	0.15	0	0	0.132653	0.0530238
PfNF54_12_m1::306444	PF3D7_1206800	2240.7	6420.15	116.79	51.95	194.845	252.05	2.97162	0.0529579
PfNF54_14_m1::1330867	PF3D7_1433400	151.13	23.885	7.235	0.835	0	0	0.200429	0.0486403
PfNF54_06_m1::253817	PF3D7_0606000	334.34	25.575	15.88	0	0	0	0.443403	0.0482582
PfNF54_14_m1::1703121	PF3D7_1441800	563.76	88.105	25.95	2.47	0	0	0.74766	0.0467683
PfNF54_14_m1::2154633	PF3D7_1452500	196.73	32.485	8.79	0	0	0	0.260904	0.045397
PfNF54_08_m1::1318070	PF3D7_0830900	358.725	67.92	15.885	3.07	0.96	0	0.475742	0.0449919
PfNF54_13_m1::1369625	PF3D7_1333400	155.65	24.425	6.89	0	0	0	0.206423	0.0449758
PfNF54_10_m1::532345	PF3D7_1013600	163.72	19.43	6.26	0	0	0	0.217126	0.0388491
PfNF54_05_m1::220076	PF3D7_0505100	144.755	24.385	5.385	0.345	0	0	0.191974	0.0377973
PfNF54_07_m1::1366070	PF3D7_0731600	371.67	51.41	11.765	0	0	0	0.49291	0.032162
PfNF54_11_m1::1023203	PF3D7_1126200	67.85	6.945	1.69	0	0	0	0.0899829	0.0253073
PfNF54_11_m1::1739772	PF3D7_1143500	281.635	96.68	6.38	1.36	1.43	0	0.373505	0.0230167
PfNF54_13_m1::1694959	PF3D7_1342900	138.125	11.89	2.73	0	0	0	0.183182	0.0200816
PfNF54_14_m1::450635	PF3D7_1411100.1	542.955	29.25	3.6	0	0	0	0.720068	0.0067367
PfNF54_13_m1::1728031	PF3D7_1343700	59.505	0	0	0	0	0	0.0789157	0
