# Supplementary material for: Quantitative insertion-site sequencing (QIseq) for high throughput phenotyping of transposon mutants
Source: HighWire-hosted journal article supplement (doi:10.1101/gr.200279.115), 2016-05-10
Supplement: Supplemental_Table_S6.xlsx [file Supplemental_Table_S6.xlsx]

## Sheet: Table S6_Data Access
Supplemental Table S6. Read accession numbers
All the reads of the experiments can be found under the following accession numbers in the European Nucleotide Archive (ENA).
Data accession numbers for each of the four experiments, see table 1
* Each sample was sequenced with both 5' and 3' libraries; the first accession number for each sample is for the 5' dirction, the second for the 3' direction
Name of condition	Sample name accession	Read accession
MiSeq Run
NegCtrl-1	ERS343896	ERR381584
NegCtrl-1	ERS343896	ERR381680
NegCtrl-2	ERS343908	ERR381596
NegCtrl-2	ERS343908	ERR381692
PB101_PB102	ERS343895	ERR381583
PB101_PB102	ERS343895	ERR381679
PB103_PB104	ERS343907	ERR381595
PB103_PB104	ERS343907	ERR381691
PB105_PB16	ERS343919	ERR381607
PB105_PB16	ERS343919	ERR381703
PB107_PB108	ERS343931	ERR381619
PB107_PB108	ERS343931	ERR381715
PB109_PB110	ERS343848	ERR381536
PB109_PB110	ERS343848	ERR381632
PB118_PB50	ERS343880	ERR381568
PB118_PB50	ERS343880	ERR381664
PB120_PB61	ERS343845	ERR381533
PB120_PB61	ERS343845	ERR381629
PB121_PB122	ERS343860	ERR381548
PB121_PB122	ERS343860	ERR381644
PB123_PB38	ERS343872	ERR381560
PB123_PB38	ERS343872	ERR381656
PB124_PB94	ERS343847	ERR381535
PB124_PB94	ERS343847	ERR381631
PB125_PB44	ERS343856	ERR381544
PB125_PB44	ERS343856	ERR381640
PB12_PB13	ERS343902	ERR381590
PB12_PB13	ERS343902	ERR381686
PB16_PB17	ERS343914	ERR381602
PB16_PB17	ERS343914	ERR381698
PB18_PB114	ERS343926	ERR381614
PB18_PB114	ERS343926	ERR381710
PB20_PB21	ERS343843	ERR381531
PB20_PB21	ERS343843	ERR381627
PB22_PB23	ERS343855	ERR381543
PB22_PB23	ERS343855	ERR381639
PB24_PB25	ERS343867	ERR381555
PB24_PB25	ERS343867	ERR381651
PB26_PB126	ERS343879	ERR381567
PB26_PB126	ERS343879	ERR381663
PB27_PB3	ERS343884	ERR381572
PB27_PB3	ERS343884	ERR381668
PB28_PB30	ERS343891	ERR381579
PB28_PB30	ERS343891	ERR381675
PB31_PB34	ERS343903	ERR381591
PB31_PB34	ERS343903	ERR381687
PB35_PB36	ERS343915	ERR381603
PB35_PB36	ERS343915	ERR381699
PB37_PB14	ERS343927	ERR381615
PB37_PB14	ERS343927	ERR381711
PB3_PB106	ERS343912	ERR381600
PB3_PB106	ERS343912	ERR381696
PB3_PB10	ERS343924	ERR381612
PB3_PB10	ERS343924	ERR381708
PB3_PB111	ERS343840	ERR381528
PB3_PB111	ERS343840	ERR381624
PB3_PB112	ERS343852	ERR381540
PB3_PB112	ERS343852	ERR381636
PB3_PB113	ERS343864	ERR381552
PB3_PB113	ERS343864	ERR381648
PB3_PB116	ERS343923	ERR381611
PB3_PB116	ERS343923	ERR381707
PB3_PB117	ERS343853	ERR381541
PB3_PB117	ERS343853	ERR381637
PB3_PB11	ERS343865	ERR381553
PB3_PB11	ERS343865	ERR381649
PB3_PB1	ERS343900	ERR381588
PB3_PB1	ERS343900	ERR381684
PB3_PB33	ERS343887	ERR381575
PB3_PB33	ERS343887	ERR381671
PB3_PB42	ERS343877	ERR381565
PB3_PB42	ERS343877	ERR381661
PB3_PB59	ERS343899	ERR381587
PB3_PB59	ERS343899	ERR381683
PB3_PB60	ERS343841	ERR381529
PB3_PB60	ERS343841	ERR381625
PB3_PB69	ERS343911	ERR381599
PB3_PB69	ERS343911	ERR381695
PB3_PB6	ERS343876	ERR381564
PB3_PB6	ERS343876	ERR381660
PB3_PB7	ERS343888	ERR381576
PB3_PB7	ERS343888	ERR381672
PB40_PB41	ERS343844	ERR381532
PB40_PB41	ERS343844	ERR381628
PB45_PB15	ERS343868	ERR381556
PB45_PB15	ERS343868	ERR381652
PB4_PB5	ERS343878	ERR381566
PB4_PB5	ERS343878	ERR381662
PB51_PB52	ERS343892	ERR381580
PB51_PB52	ERS343892	ERR381676
PB53_PB54	ERS343904	ERR381592
PB53_PB54	ERS343904	ERR381688
PB55_PB56	ERS343916	ERR381604
PB55_PB56	ERS343916	ERR381700
PB57_PB58	ERS343928	ERR381616
PB57_PB58	ERS343928	ERR381712
PB62_PB63	ERS343857	ERR381545
PB62_PB63	ERS343857	ERR381641
PB64_PB65	ERS343869	ERR381557
PB64_PB65	ERS343869	ERR381653
PB66_PB67	ERS343881	ERR381569
PB66_PB67	ERS343881	ERR381665
PB68_PB70	ERS343893	ERR381581
PB68_PB70	ERS343893	ERR381677
PB71_PB72	ERS343905	ERR381593
PB71_PB72	ERS343905	ERR381689
PB73_PB74	ERS343917	ERR381605
PB73_PB74	ERS343917	ERR381701
PB75_PB76	ERS343929	ERR381617
PB75_PB76	ERS343929	ERR381713
PB77_PB78	ERS343846	ERR381534
PB77_PB78	ERS343846	ERR381630
PB79_PB80	ERS343858	ERR381546
PB79_PB80	ERS343858	ERR381642
PB81_PB82	ERS343870	ERR381558
PB81_PB82	ERS343870	ERR381654
PB83_PB84	ERS343882	ERR381570
PB83_PB84	ERS343882	ERR381666
PB85_PB8	ERS343894	ERR381582
PB85_PB8	ERS343894	ERR381678
PB87_PB115	ERS343906	ERR381594
PB87_PB115	ERS343906	ERR381690
PB89_PB90	ERS343918	ERR381606
PB89_PB90	ERS343918	ERR381702
PB91_PB92	ERS343930	ERR381618
PB91_PB92	ERS343930	ERR381714
PB95_PB96	ERS343859	ERR381547
PB95_PB96	ERS343859	ERR381643
PB97_PB98	ERS343871	ERR381559
PB97_PB98	ERS343871	ERR381655
PB99_PB100	ERS343883	ERR381571
PB99_PB100	ERS343883	ERR381667
PB9_PB19	ERS343890	ERR381578
PB9_PB19	ERS343890	ERR381674
Uncloned mixed populations 19 MPs
2012UKnMP12	ERS343874	ERR471160
2012UKnMP12	ERS343874	ERR471188
2012UKnMP12	ERS343874	ERR471216
2012UKnMP12	ERS343874	ERR471244
2012UKnMP13	ERS343886	ERR471164
2012UKnMP13	ERS343886	ERR471192
2012UKnMP13	ERS343886	ERR471220
2012UKnMP13	ERS343886	ERR471248
2012UKnMP14	ERS343898	ERR471167
2012UKnMP14	ERS343898	ERR471195
2012UKnMP14	ERS343898	ERR471223
2012UKnMP14	ERS343898	ERR471251
2012UKnMP15	ERS343910	ERR471170
2012UKnMP15	ERS343910	ERR471198
2012UKnMP15	ERS343910	ERR471226
2012UKnMP15	ERS343910	ERR471254
2012UKnMP16	ERS343922	ERR471173
2012UKnMP16	ERS343922	ERR471201
2012UKnMP16	ERS343922	ERR471229
2012UKnMP16	ERS343922	ERR471257
2012UKnMP17	ERS343839	ERR471149
2012UKnMP17	ERS343839	ERR471177
2012UKnMP17	ERS343839	ERR471205
2012UKnMP17	ERS343839	ERR471233
2012UKnMP18	ERS343851	ERR471153
2012UKnMP18	ERS343851	ERR471181
2012UKnMP18	ERS343851	ERR471209
2012UKnMP18	ERS343851	ERR471237
2012UKnMP19	ERS343863	ERR471157
2012UKnMP19	ERS343863	ERR471185
2012UKnMP19	ERS343863	ERR471213
2012UKnMP19	ERS343863	ERR471241
2012UKnMP1	ERS343837	ERR471147
2012UKnMP1	ERS343837	ERR471175
2012UKnMP1	ERS343837	ERR471203
2012UKnMP1	ERS343837	ERR471231
2012UKnMP2	ERS343849	ERR471151
2012UKnMP2	ERS343849	ERR471179
2012UKnMP2	ERS343849	ERR471207
2012UKnMP2	ERS343849	ERR471235
2012UKnMP3	ERS343861	ERR471155
2012UKnMP3	ERS343861	ERR471183
2012UKnMP3	ERS343861	ERR471211
2012UKnMP3	ERS343861	ERR471239
2012UKnMP4	ERS343873	ERR471159
2012UKnMP4	ERS343873	ERR471187
2012UKnMP4	ERS343873	ERR471215
2012UKnMP4	ERS343873	ERR471243
2012UKnMP5	ERS343885	ERR471163
2012UKnMP5	ERS343885	ERR471191
2012UKnMP5	ERS343885	ERR471219
2012UKnMP5	ERS343885	ERR471247
2012UKnMP6	ERS343897	ERR471166
2012UKnMP6	ERS343897	ERR471194
2012UKnMP6	ERS343897	ERR471222
2012UKnMP6	ERS343897	ERR471250
2012UKnMP7	ERS343909	ERR471169
2012UKnMP7	ERS343909	ERR471197
2012UKnMP7	ERS343909	ERR471225
2012UKnMP7	ERS343909	ERR471253
2013UknMP10	ERS343850	ERR471152
2013UknMP10	ERS343850	ERR471180
2013UknMP10	ERS343850	ERR471208
2013UknMP10	ERS343850	ERR471236
2013UknMP8	ERS343921	ERR471172
2013UknMP8	ERS343921	ERR471200
2013UknMP8	ERS343921	ERR471228
2013UknMP8	ERS343921	ERR471256
2013UknMP9	ERS343838	ERR471148
2013UknMP9	ERS343838	ERR471176
2013UknMP9	ERS343838	ERR471204
2013UknMP9	ERS343838	ERR471232
2014UknMP11	ERS343862	ERR471156
2014UknMP11	ERS343862	ERR471184
2014UknMP11	ERS343862	ERR471212
2014UknMP11	ERS343862	ERR471240
Parallel Phenotype 41 mutants
PP-10	ERS382931	ERR438840
PP-11	ERS382932	ERR438841
PP-12	ERS382933	ERR438842
PP-13	ERS382934	ERR438843
PP-14	ERS382935	ERR438844
PP-15	ERS382936	ERR438845
PP-16	ERS382937	ERR438846
PP-17	ERS382938	ERR438847
PP-18	ERS382939	ERR438848
PP-19	ERS382940	ERR438849
PP-1	ERS382922	ERR438831
PP-20	ERS382941	ERR438850
PP-21	ERS382942	ERR438851
PP-22	ERS382943	ERR438852
PP-23	ERS382944	ERR438853
PP-24	ERS382945	ERR438854
PP-2	ERS382923	ERR438832
PP-3	ERS382924	ERR438833
PP-4	ERS382925	ERR438834
PP-5	ERS382926	ERR438835
PP-6	ERS382927	ERR438836
PP-7	ERS382928	ERR438837
PP-8	ERS382929	ERR438838
PP-9	ERS382930	ERR438839
Parallel Phenotype 128 mutants
PfPbA-1	ERS551483	ERR696965
PfPbA-1	ERS551483	ERR696977
PfPbA-2	ERS551484	ERR696966
PfPbA-2	ERS551484	ERR696978
PfPbB-1	ERS551485	ERR696967
PfPbB-1	ERS551485	ERR696979
PfPbB-2	ERS551486	ERR696968
PfPbB-2	ERS551486	ERR696980
PfPbC-1	ERS551487	ERR696969
PfPbC-1	ERS551487	ERR696981
PfPbC-2	ERS551488	ERR696970
PfPbC-2	ERS551488	ERR696982
PfPbD-1	ERS551489	ERR696971
PfPbD-1	ERS551489	ERR696983
PfPbD-2	ERS551490	ERR696972
PfPbD-2	ERS551490	ERR696984
PfPbE-1	ERS551491	ERR696973
PfPbE-1	ERS551491	ERR696985
PfPbE-2	ERS551492	ERR696974
PfPbE-2	ERS551492	ERR696986
PfPbF-1	ERS551493	ERR696975
PfPbF-1	ERS551493	ERR696987
PfPbF-2	ERS551494	ERR696976
PfPbF-2	ERS551494	ERR696988
